# Supplementary material
Source: PubMed Central journal article supplement (PMC3104513)
Supplement: ncomms1265-s1.pdf [file ncomms1265-s1.pdf]

# Supplementary Information

**This Supplementary Information includes:**

## **1. Supplementary Figures:**

- Supplementary Figure S1. Historical patterns of data types in the input data set.
- Supplementary Figure S2. Historical patterns of survey locations by continent in the input data set.
- Supplementary Figure S3. Model validation plots.
- Supplementary Figure S4. Historical malaria endemicity map.
- Supplementary Figure S5. Greyscale image of Figure 3: Global Duffy blood group allele frequencies and uncertainty maps.
- Supplementary Figure S6. Greyscale image of Figure 4: Global distribution of the Duffy negativity phenotype.
- Supplementary Figure S7. Greyscale image of Figure 5: Characteristics of the Duffy negativity phenotype in Africa.
- Supplementary Figure S8. Comparative display of the HGHG and MAP allele frequency maps for  $FY*B^{ES}$  and  $FY*B$  in Africa.
- Supplementary Figure S9. Histogram of differences between frequency categories of the HGHG and MAP predictions for  $FY*B^{ES}$  and  $FY*B$  allele frequencies in Africa (HGHG – MAP prediction).
- Supplementary Figure S10. Comparative display of the HGHG and MAP allele frequency maps of  $FY*A$  globally.

## **2. Supplementary Tables:**

- Supplementary Table S1. MCMC output parameter values at the three modelled loci.
- Supplementary Table S2.  $\beta_{\text{africa}}$  covariate summary statistics.
- Supplementary Table S3. Duffy positive samples in the predicted 98-100% Duffy Negative region.

## **3. Supplementary Discussion:**

- Comparison with existing maps.
- $FY*X$  variant: potential further elaboration to the model.

## **4. Supplementary Methods:**

- Mathematical description of the Bayesian geostatistical model and its implementation.
- Model validation procedure.
- Variability of Duffy typing diagnostic methods.

## **5. Supplementary References:**

- Supplementary References. Sources from which data points were identified.

## Supplementary Figures

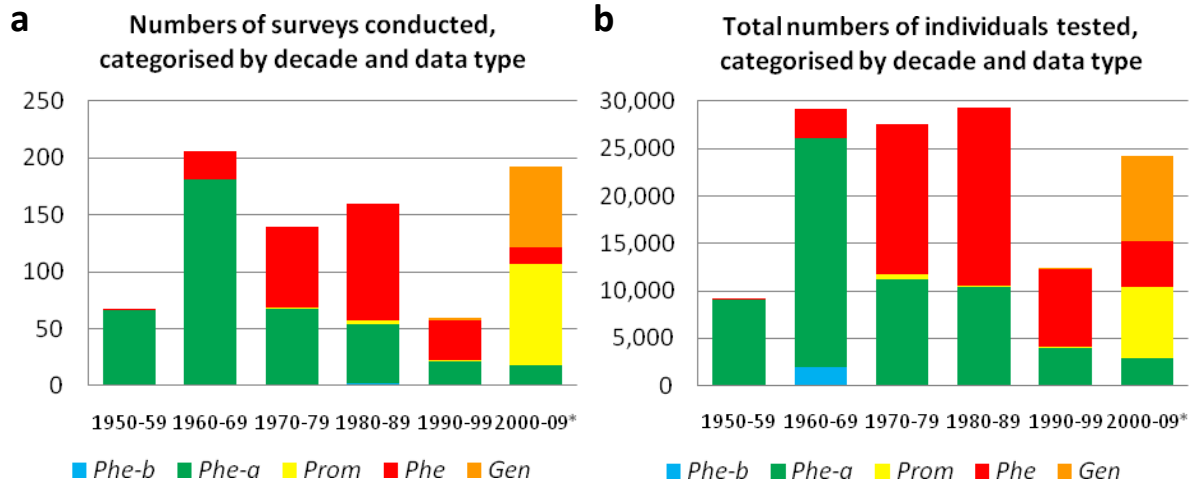

**Supplementary Figure S1. Historical patterns of data types in the input data set.** (a) Patterns according to survey numbers with colour-coded according to data points in Figure 2; (b) Patterns according to total individuals sampled. (\*includes data from unpublished sources acquired in 2010).

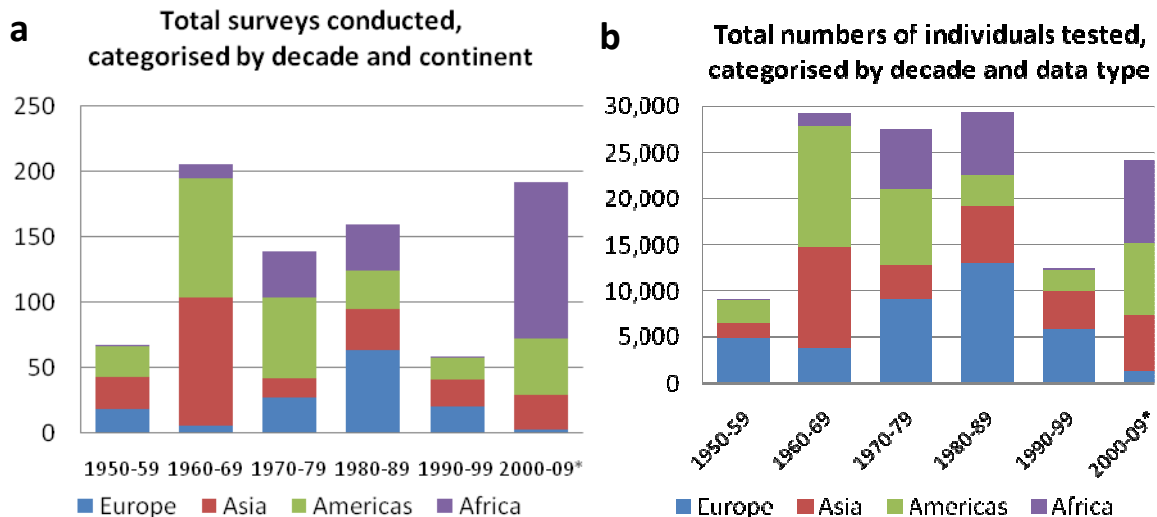

**Supplementary Figure S2. Historical patterns of survey locations by continent in the input data set.** (a) Patterns according to survey numbers; (b) Patterns according to total individuals sampled. (\*includes data from unpublished sources acquired in 2010)

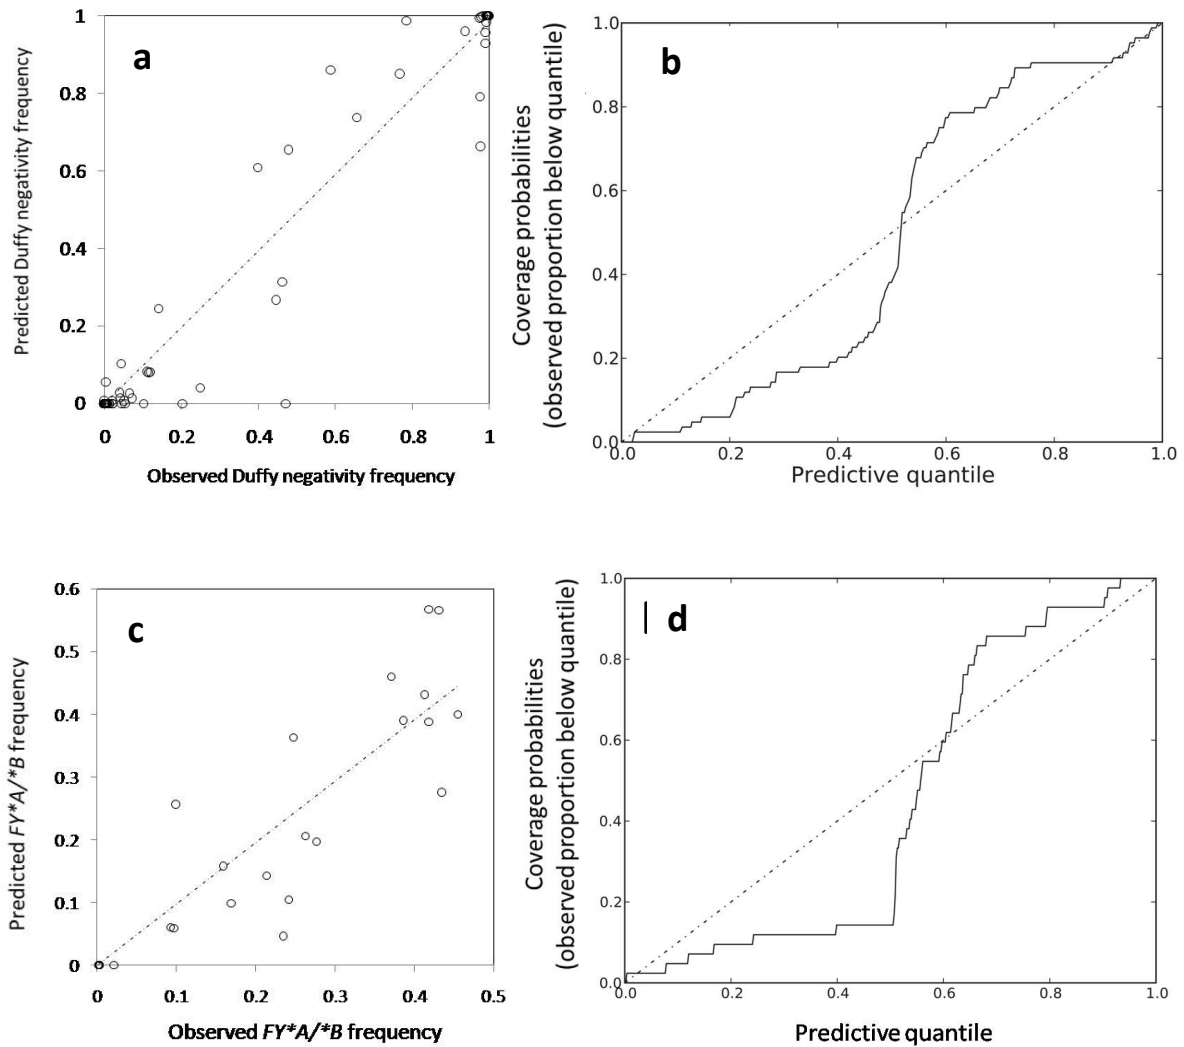

**Supplementary Figure S3. Model validation plots.** (a) Scatter plot of actual versus predicted point-values of Duffy negativity prevalence. (b) Probability-probability plot comparing predicted probability thresholds with the actual proportion of true values below quantile for Duffy negativity; (c) and (d) show equivalent plots for  $FY^*A/*B$  heterozygosity validation. In all plots the 1:1 line is also shown (dashed line) for reference.

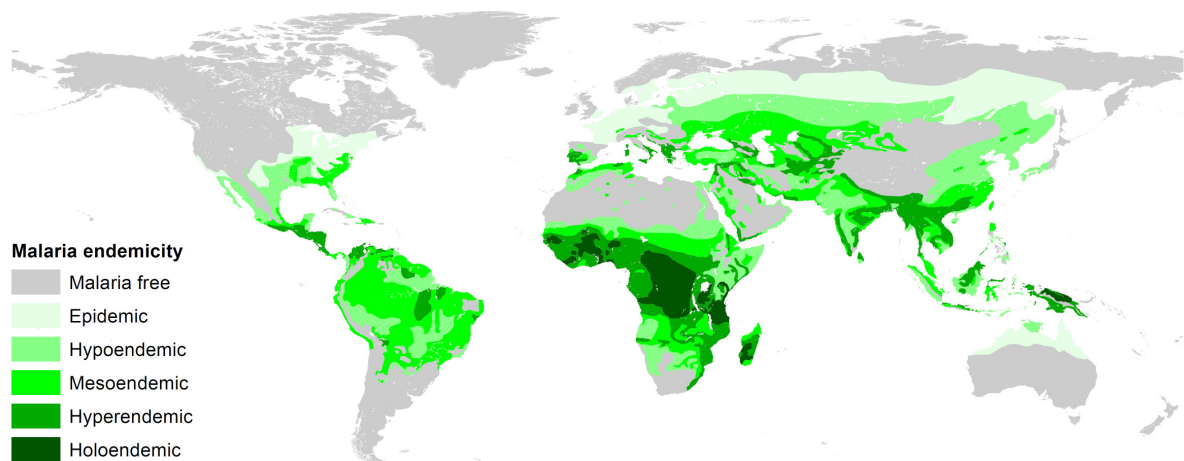

**Supplementary Figure S4. Historical malaria endemicity map**, originally generated by Lysenko and Semashko<sup>52</sup>, recently republished and fully described by Piel *et al*<sup>53</sup>. The classes are defined by parasite rates ( $PR_{2-10}$ , the proportion of 2 to 10 years olds with parasites in their peripheral blood): malaria free,  $PR_{2-10} = 0$ ; epidemic,  $PR_{2-10} \approx 0$ ; hypoendemic,  $PR_{2-10} < 0.10$ ; mesoendemic,  $PR_{2-10} \geq 0.10$  and  $< 0.50$ ; hyperendemic,  $PR_{2-10} \geq 0.50$  and  $< 0.75$ ; holoendemic  $PR_{0-1} \geq 0.75$  (this class was measured in 0 to 1 year olds)<sup>53</sup>.

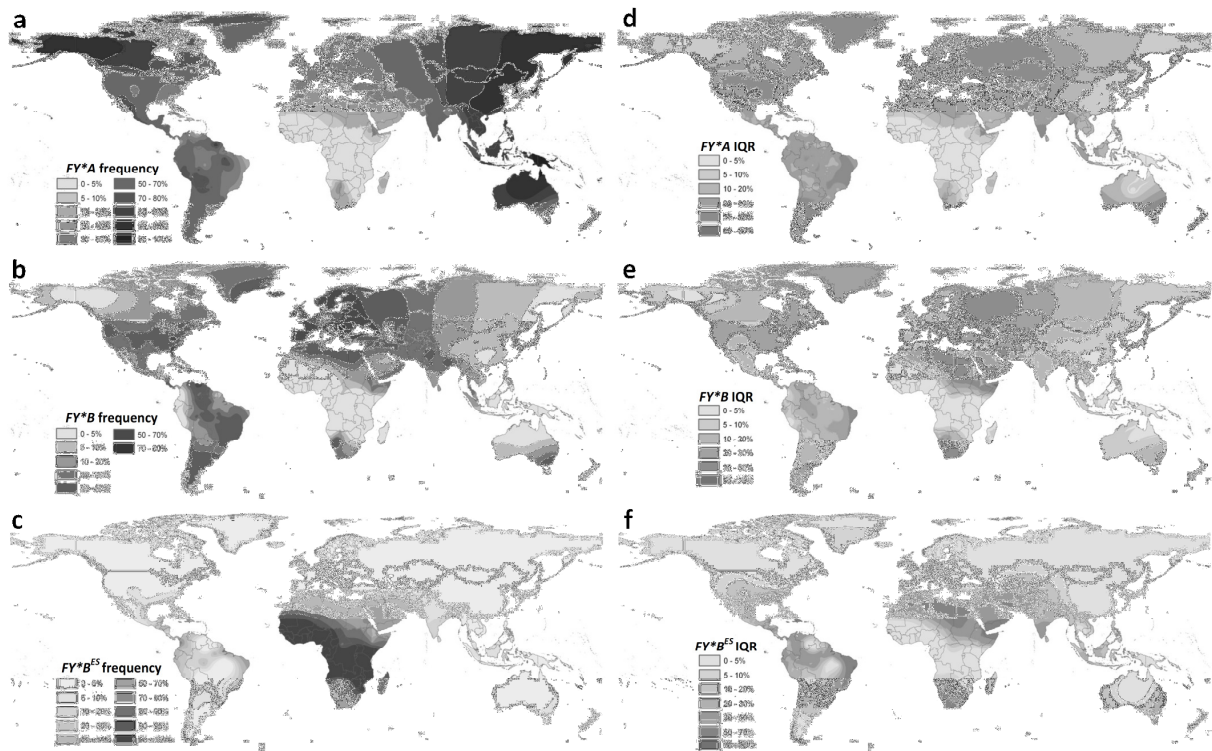

**Supplementary Figure S5. Greyscale image of Figure 3: Global Duffy blood group allele frequencies and uncertainty maps.** (a), (b) and (c) correspond to  $FY^*A$ ,  $FY^*B$  and  $FY^*B^{ES}$  allele frequency maps, respectively; (d), (e) and (f) show the respective inter-quartile ranges (IQR) of each allele frequency map (25% to 75% interval). Predictions are made on a 5 x 5 km grid in Africa and 10 x 10 km grid elsewhere.

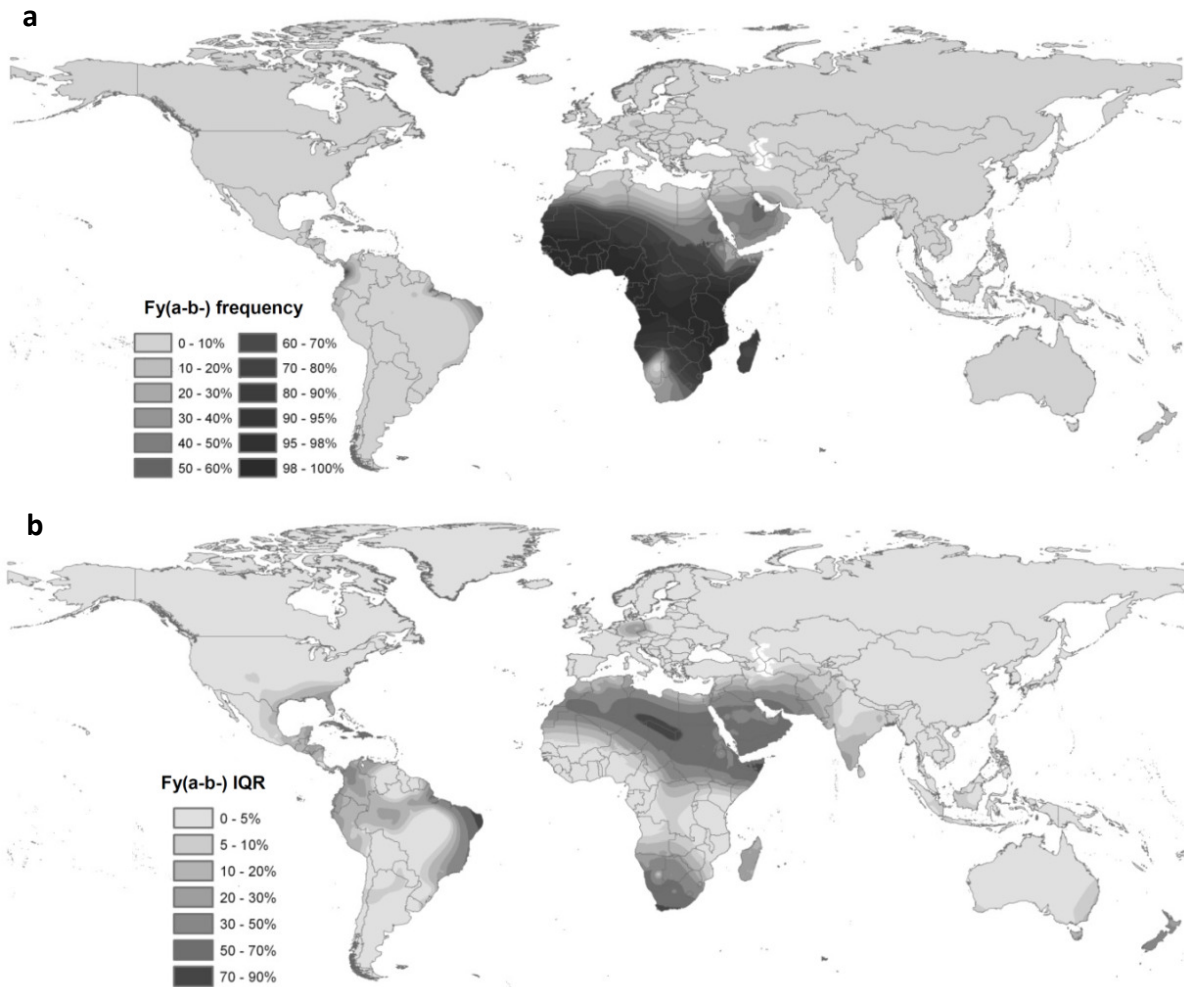

**Supplementary Figure S6. Greyscale image of Figure 4: Global distribution of the Duffy negativity phenotype.** (a) Global prevalence of Fy(a-b-); (b) associated uncertainty map. Uncertainty is represented by the interval between the 25% and 75% quartiles of the posterior distribution (IQR).

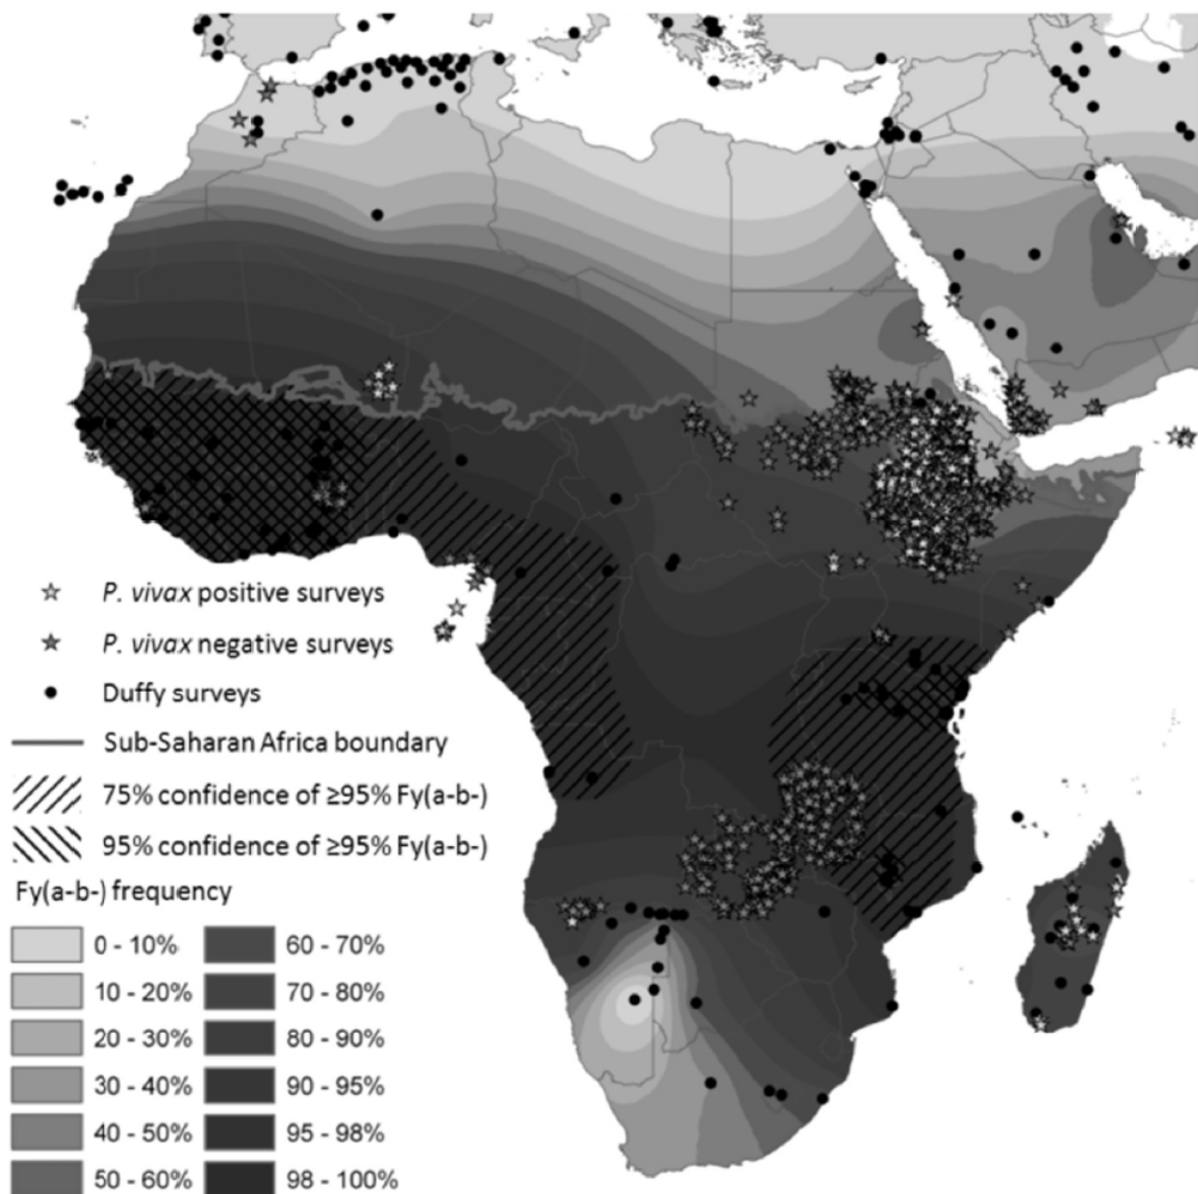

**Supplementary Figure S7. Greyscale image of Figure 5: Characteristics of the Duffy negativity phenotype in Africa.** This figure shows the covariate line (in pale grey) which separates sub-Saharan African populations from the rest of the continent; hatched areas indicate areas of confidence in the distribution of  $\geq 95\%$  Duffy negativity frequency: with 75% and 95% confidence. Black data points correspond to the input Duffy data points ( $n=821$ ). Pale grey stars indicate locations of *P. vivax* positive community surveys ( $n=354$ ), and darker grey stars *P. vivax* negative surveys ( $n=1405$ ) [data assembled by the Malaria Atlas Project].

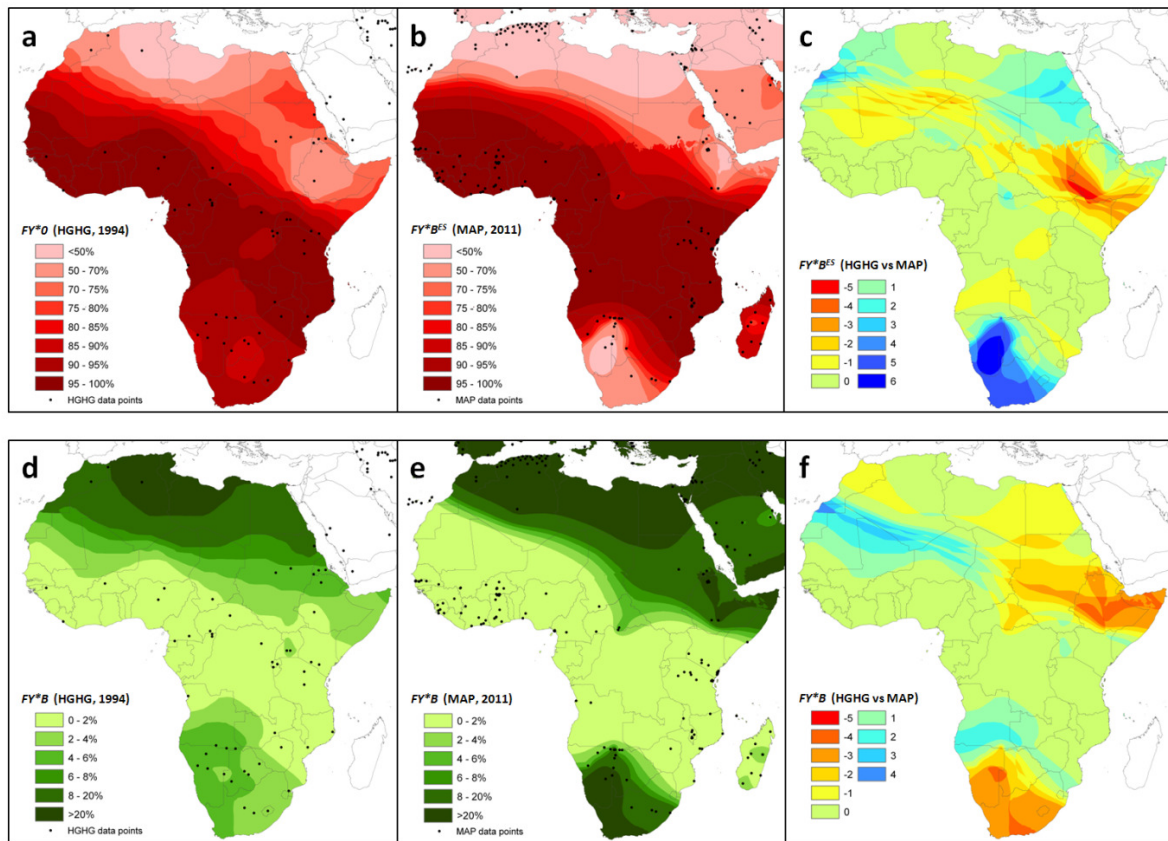

**Supplementary Figure S8. Comparative display of the HGHG and MAP allele frequency maps for  $FY^*B^{ES}$  and  $FY^*B$  in Africa.** Supplementary Figures S8a-c represent the silent  $FY^*B^{ES}$  allele (denoted  $FY^*O$  in the HGHG), and S8d-f the  $FY^*B$  allele frequencies. Differences between the HGHG maps (S8a and S8d) and the new maps (S8b and S8e) are shown in panels S8c and S8f, respectively. Discrepancies are represented by the difference in number of classes between the two versions, based on the categorical classes defined by the HGHG maps. Negative differences (yellow to red) indicate areas where the MAP version predicted higher frequencies than the HGHG version, positive differences (in blue) are where the HGHG version predicted frequencies higher than in the new version. Same class predictions in the HGHG and MAP versions appear in pale green. Black datapoints represent input data points (HGHG: n=41; MAP: n=203).



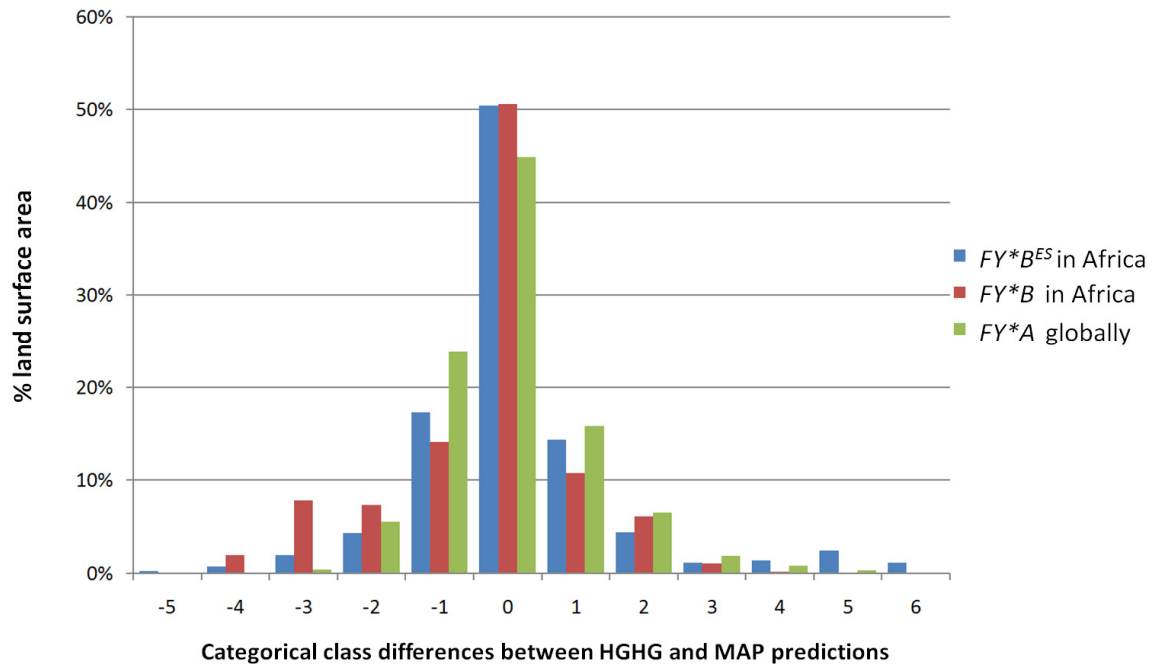

**Supplementary Figure S9. Histogram of differences between frequency categories of the HGHG and MAP predictions for *FY\*B<sup>ES</sup>* and *FY\*B* allele frequencies in Africa (HGHG – MAP prediction).** Negative differences indicate higher frequency predictions in the MAP version than in the HGHG version; positive differences mean the HGHG version predicted frequencies higher than in the new version. The differences are quantified by proportions of land surface area.

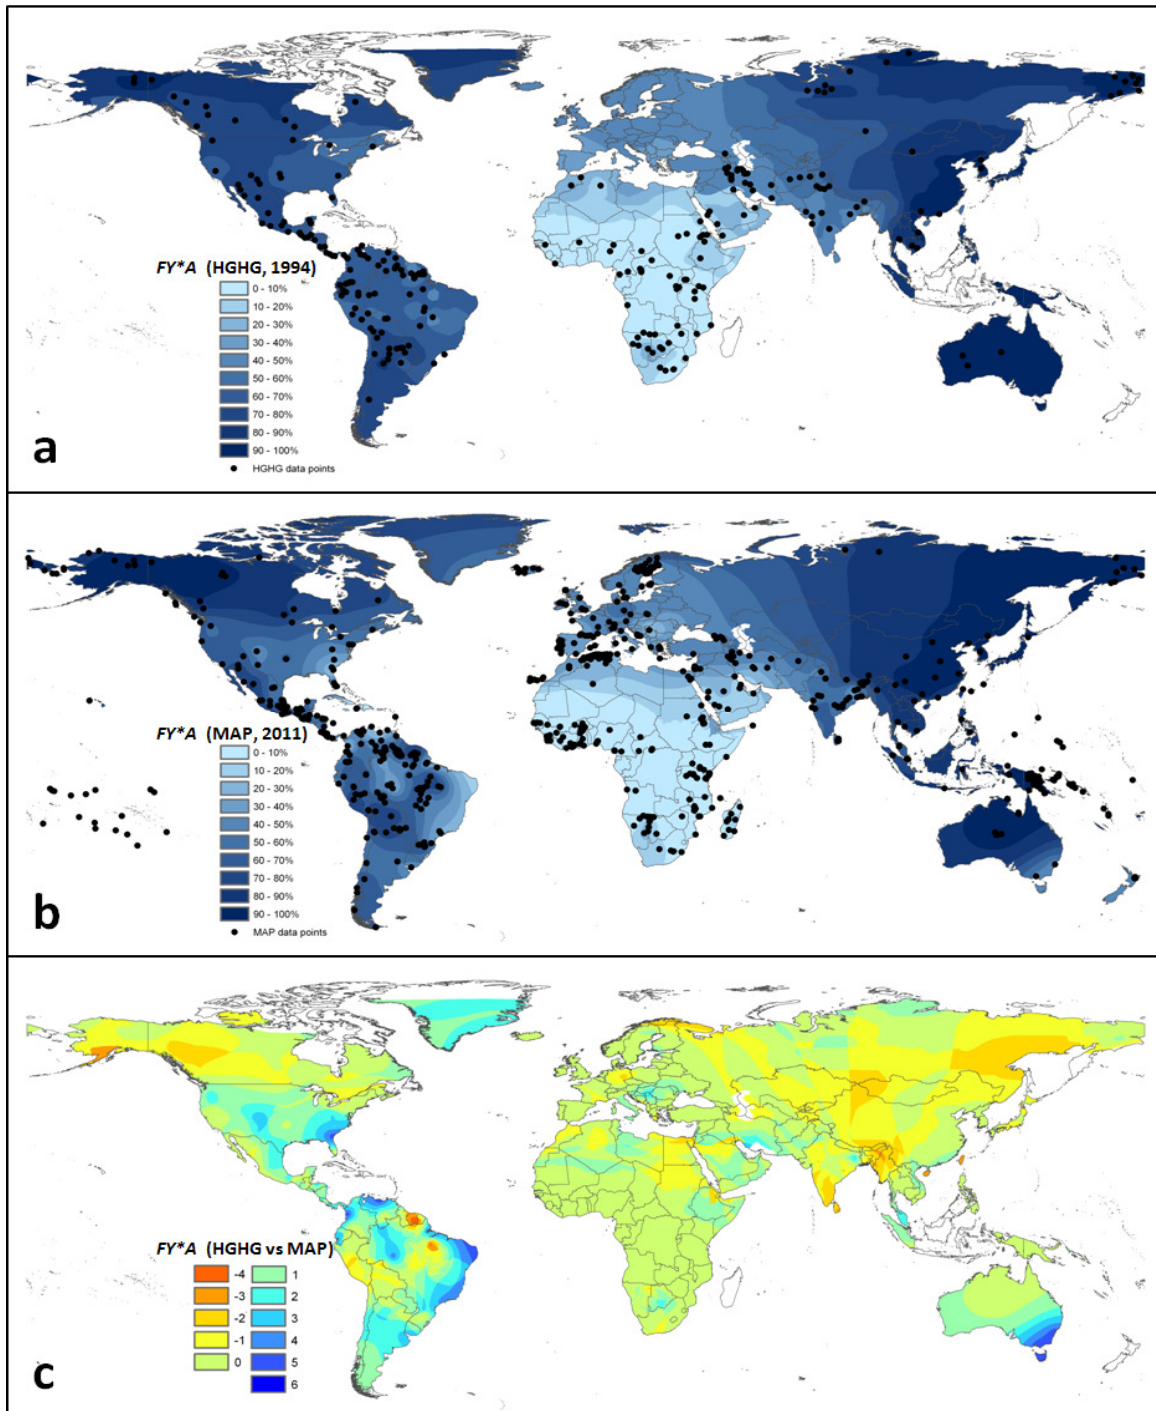

**Supplementary Figure S10. Comparative display of the HGHG and MAP allele frequency maps of FY\*A globally.**

Differences between the HGHG map (S10a) and the new map (S10b) are shown in panel S9c. Discrepancies are represented by the difference in number of classes between the two versions, based on the categorical classes defined by the HGHG maps. Negative differences (yellow to orange) indicate areas where the MAP version predicted higher frequencies than the HGHG version; positive differences (in blue) are shown where the HGHG version predicted frequencies higher than in the new version. Pale green indicates same class predictions in both versions. Blanks in the HGHG and difference maps indicate areas where no prediction was made, including many islands, most prominently Madagascar and large parts of Indonesia. Black datapoints represent input data points (HGHG: n=751; MAP: n=821). [Although it was only possible to digitise 241 of the HGHG datapoints from their published map – many appear to be spatial duplicates, and the European datapoints were missing from their global FY\*A map].

## Supplementary Tables

| Parameter            | Model term<br>$p_{ab}$ | Parameter         | Model term<br>$p_0$ | Parameter    | Model term<br>$p_1$ |
|----------------------|------------------------|-------------------|---------------------|--------------|---------------------|
| $\phi_{ab}$ mean     | 3.57                   | $\phi_0$ mean     | 7.02                | $p_1$ mean   | 0.0119              |
| $\phi_{ab}$ median   | 3.36                   | $\phi_0$ median   | 6.26                | $p_1$ median | 0.0119              |
| $\phi_{ab}$ std      | 1.24                   | $\phi_0$ std      | 2.70                | $p_1$ std    | 0.000921            |
| $\phi_{ab}$ IQR      | 1.64                   | $\phi_0$ IQR      | 3.36                | $p_1$ IQR    | 0.00130             |
| $\phi_{ab}$ 95 BCI   | 4.91                   | $\phi_0$ 95 BCI   | 10.5                | $p_1$ 95 BCI | 0.00368             |
|                      |                        |                   |                     |              |                     |
| $\theta_{ab}$ mean   | 4.99                   | $\theta_0$ mean   | 3.05                |              |                     |
| $\theta_{ab}$ median | 4.83                   | $\theta_0$ median | 2.23                |              |                     |
| $\theta_{ab}$ std    | 3.04                   | $\theta_0$ std    | 2.74                |              |                     |
| $\theta_{ab}$ IQR    | 4.02                   | $\theta_0$ IQR    | 3.11                |              |                     |
| $\theta_{ab}$ 95 BCI | 11.9                   | $\theta_0$ 95 BCI | 10.7                |              |                     |
|                      |                        |                   |                     |              |                     |
| $\nu_{ab}$ mean      | 0.377                  | $\nu_0$ mean      | 0.422               |              |                     |
| $\nu_{ab}$ median    | 0.380                  | $\nu_0$ median    | 0.427               |              |                     |
| $\nu_{ab}$ std       | 0.0412                 | $\nu_0$ std       | 0.0473              |              |                     |
| $\nu_{ab}$ IQR       | 0.0640                 | $\nu_0$ IQR       | 0.0769              |              |                     |
| $\nu_{ab}$ 95 BCI    | 0.156                  | $\nu_0$ 95 BCI    | 0.152               |              |                     |
|                      |                        |                   |                     |              |                     |
| $V_{ab}$ mean        | 0.152                  | $V_0$ mean        | 0.345               |              |                     |
| $V_{ab}$ median      | 0.149                  | $V_0$ median      | 0.323               |              |                     |
| $V_{ab}$ std         | 0.0322                 | $V_0$ std         | 0.123               |              |                     |
| $V_{ab}$ IQR         | 0.0492                 | $V_0$ IQR         | 0.163               |              |                     |
| $V_{ab}$ 95 BCI      | 0.114                  | $V_0$ 95 BCI      | 0.478               |              |                     |

**Supplementary Table S1. MCMC output parameter values at the three modelled loci.** The first columns refer to the locus differentiating  $FY^*A$  from  $FY^*B$ . The association of the  $FY^*B$  variant with the silencing Duffy negative mutation (-33C; i.e. the  $FY^*B^{ES}$  allele) is considered in the middle columns. The third term, the  $p_1$  variant, represents the constant modelling the frequency of association between the  $FY^*A$  variant and the silencing promoter mutation (i.e. the  $FY^*A^{ES}$  allele). Spatially variable parameters reported include amplitude ( $\phi_0$  and  $\phi_{ab}$ ), scale ( $\theta_0$  and  $\theta_{ab}$ ), degree of differentiability ( $\nu_0$  and  $\nu_{ab}$ ) and nugget variances ( $V_0$  and  $V_{ab}$ ). Summary statistics of the MCMC output include mean and median values, standard deviation ('std'), 50% interquartile range ('IQR') and 95% Bayesian credible intervals ('95 BCI'). Scale is measured in units of earth radii; other parameters are unitless. Values are presented to three significant figures.

| Statistic | Sub-Saharan Africa covariate effect |
|-----------|-------------------------------------|
| Median    | 0.832                               |
| Mean      | 0.829                               |
| STD       | 0.310                               |
| IQR       | 0.420                               |
| 95% BCI   | 1.214                               |

**Supplementary Table S2. Summary statistics for the sub-Saharan Africa ( $\beta_{\text{africa}}$ ) covariate effect.**

The posterior is concentrated in positive values, indicating that the covariate increases likelihood of association between the silencing mutation and the *FY\*B* locus in the sub-Saharan Africa region. This is reflected by increased frequencies of *FY\*B<sup>ES</sup>* south of the covariate boundary. (Full model details are given in the Supplementary Methods 1, pages S2-4).

|                    | N sites | N samples (all sites) | Variants                                   |       | % Duffy positive <sup>†</sup>    |
|--------------------|---------|-----------------------|--------------------------------------------|-------|----------------------------------|
| <b>Genotype</b>    | 22      | 272                   | <i>FY*B<sup>ES</sup>/FY*B<sup>ES</sup></i> | 272   | 0%                               |
| <b>Phenotype</b>   | 11      | 3,738                 | Fy(a+b+)                                   | 1     | 0.70%                            |
|                    |         |                       | Fy(a+b-)                                   | 13    |                                  |
|                    |         |                       | Fy(a-b+)                                   | 12    |                                  |
|                    |         |                       | Fy(a-b-)                                   | 3,712 |                                  |
| <b>Promoter</b>    | 83      | 7290                  | Fy-pos                                     | 24    | 0.33%                            |
|                    |         |                       | Fy-neg                                     | 7,266 |                                  |
| <b>Phenotype-a</b> | 5       | 508                   | Fy(a+)                                     | 7     | 1.38%<br>(excludes any Fy(a-b+)) |
|                    |         |                       | Fy(a-)                                     | 501   |                                  |
| <b>Phenotype-b</b> | 2       | 148                   | Fy(b+)                                     | 1     | 0.68%<br>(excludes any Fy(a-b-)) |
|                    |         |                       | Fy(b-)                                     | 147   |                                  |

**Supplementary Table S3. Duffy positive samples in the predicted 98-100% Duffy Negative region.**

Total surveys conducted in this region: n=123.

<sup>†</sup> Of the 11,956 individuals surveyed across the predicted 98-100% Duffy negativity region, 58 Duffy positive individuals were identified at 22 sites across nine countries: Angola, Cameroon, Côte d'Ivoire, The Gambia, Kenya, Malawi, Mozambique, Nigeria and the United Republic of Tanzania.

## Supplementary Discussion

### **Comparison with existing maps.**

The only previously published maps of the Duffy alleles are those of Cavalli-Sforza *et al*, in their History and Geography of Human Genes (HGHG<sup>54</sup>). The following discussion centres on (i) the general and (ii) the specific cartographic differences between these two mapping efforts.

In general terms, both efforts employed a similar conceptual framework: an evidence-base of Duffy blood group surveys which informs a statistical model and generates a prediction map. The main methodological differences between the HGHG and the current mapping efforts can, therefore, be examined as (i) the evidence-base, and (ii) the statistical modelling method employed. The third aspect of this discussion will examine the specific differences between the resulting maps.

#### **1. Database**

The most obvious advantage that the MAP database has over the HGHG evidence base is twenty years of additional data collection, including all the genotyped data (the most informative data type). The data assembly effort, including reference gathering methods, criteria for survey inclusion and geopositioning protocols are documented in more detail in this effort than previously in the HGHG. In addition, from our review of their sources, it is apparent that non-representative samples of communities were included in the HGHG dataset, such as studies selecting specific ethnic groups from ethnically diverse communities, groups of related individuals and malaria patients, providing potentially biased allelic frequency estimates. These various limitations were addressed in the present study.

The methodological descriptions provided in this paper and the referenced sources for additional information are intended to provide sufficient detail to enable independent reproduction and thus objective evaluation. This addresses another significant limitation to the methods of the HGHG protocols, where only limited documentation is presented on the cartographic methodology employed. The full list of sources used here is given in the Supplementary References; the complete derived database will be made freely accessible online in mid-2011 (the model input extracted from the database is published here as Supplementary Data); the statistical code is freely available for download from the open-access github repository (<https://github.com/malaria-atlas-project>).

#### **2. Statistical mapping model**

The statistical mapping methods employed in the present effort benefit from two decades of development in the field of geostatistics, enabling better representation of small-scale variation in gene frequencies. The most significant development, however, relates to the Bayesian framework which allows the map surface to be interpreted according to its relative reliability by generating numerous iterations of predictions from which various summary indicators (e.g. mean or median) and uncertainty measures can be derived. An immediate advantage of this is enabling predictions for regions where data are absent, and quantifying the certainty in the predictions; in contrast, data

limitations, such as in Madagascar, prevented Cavalli-Sforza *et al* from making predictions in data-poor areas. Further, the importance of uncertainty metrics has recently been emphasised to the public health research community<sup>55</sup>.

Furthermore, the HGHG model input was restricted to surveys specifically informing the frequency of each variant, with each variant being mapped in isolation of the others, in spite of their intricate associations. The multi-allelic framework employed here, adapted for the five data types previously described, allowed all data to inform the predictions of each allele simultaneously.

### **3. Spatial differences between maps**

Comparisons of the predictions for all three alleles are discussed here. As Cavalli-Sforza *et al*<sup>54</sup> do not present global frequency maps for all alleles, predictions of *FY\*B* and *FY\*B<sup>ES</sup>* frequencies focus on the African continent, while the *FY\*A* maps are discussed on a global scale.

A limitation of the practical applicability of the HGHG maps is that their outputs include only gene frequency maps. We present here the first published Duffy negativity phenotype map, as we believe this output will be most informative to the anticipated end-user community. A further limitation of the HGHG maps derives from their presentation, specifically the categorical boundaries employed. The highest allele frequency band (95-100%) corresponds to a wide range of Duffy negative phenotype frequencies (90-100%), which could encompass a wide range of *P. vivax* epidemiological scenarios. Modelled as a continuous measure, the new version can be used as a continuous or categorical surface (available on request from the authors).

### i. Null Duffy allele, $FY*B^{ES}$ , and $FY*B$ in Africa

Visual comparison of the  $FY*B^{ES}$  and  $FY*B$  series of maps for Africa (Supp. Figure S8) reveals roughly comparable unskewed outputs, an observation supported by quantitative summaries of the difference maps (Supp. Figure S9). The categorical difference maps (Supp. Figure S8c and S8f) reveal 50% and 51% concordance for  $FY*B^{ES}$  and  $FY*B$  frequency predictions, respectively, between the HGHG and MAP maps (Supp. Figure S9). A quarter (24%) of the  $FY*B$  prediction surface area differed by two classes or more ( $\geq 4\%$  difference in allelic frequency), and 18% of the  $FY*B^{ES}$  predicted area differed by 20% or more (2 frequency classes).

Due to the additive nature of the variant frequencies, the location of the discrepancies overlaps for both alleles, namely the boundary zone around the region of highest Duffy negativity prevalence. The most striking area of discrepancy is the prediction for southern Africa, where the HGHG map predicts much higher frequencies of  $FY*B^{ES}$  and lower frequencies of  $FY*B$  than the new iteration does, a reflection of the new dataset which includes surveys reporting very low rates and even absence of Duffy negativity in the local population, an element not reflected in the HGHG map. At the eastern limit of the high frequency zone, the indent of lower  $FY*B^{ES}$  and higher  $FY*B$  frequencies into Sudan is less pronounced into the HGHG map than the current one. Similarly, predictions in Ethiopia for frequencies of both allele frequencies are generally lower in the HGHG map. The position of the northern boundary of high Duffy negativity differs by one or two classes between the maps, with higher frequencies of  $FY*B^{ES}$  stretching further north and correspondingly lower frequencies of  $FY*B$  predicted in the new maps.

The database updates yielded a five-fold increase in the input evidence-base, from  $n_{\text{Africa}}=41$  in the HGHG version (though only 27 points could be digitised from their published maps) to  $n_{\text{Africa}}=203$  in the current iteration (including 37 *Genotype* and 61 *Phenotype*), (Figure 2). The differences in the southern and eastern parts of the distributions are directly informed by the updated dataset. Notably, the highly informative genotype datapoints in southern Ethiopia enable the more spatially convoluted prediction in this area. However, being transition regions becoming increasingly heterozygous, both are also areas of high uncertainty (Figure 3e-f). The spectrum of frequencies across the western and central Sahara is informed by a much larger dataset in the current iteration than the HGHG one, both across the sub-Saharan countries (Nigeria and West Africa: 3 datapoints in the HGHG, 64 in the updated dataset) and the Maghreb region (west of Libya: 1 datapoint in the HGHG, 29 in the updated version). However, no surveys were identified within the Sahara region, likely a reflection of the low population densities in the area. The exact position of the frequency class boundaries therefore, as it corresponds to almost zero population levels, is of minor consequence. MAP predictions across the desert are moderated by increased uncertainty (Figure 3d-f), contrasting with the much more certain predictions across central Africa.

## ii. *FY\*A* global distribution

Only *FY\*A* and *FY\*B* are commonly found outside the Africa region. To avoid repetition, only the one set of maps are discussed here – *FY\*A*, the only global Duffy allele frequency map presented in the HGHG.

Overall the *FY\*A* HGHG and MAP maps reveal good correspondence (Supp. Figure S10), with 85% of the prediction surfaces being within 10% of the other. Largest differences are in the Americas, where the population composition is known to be highly heterogeneous with populations of diverse origins. Predictions from south eastern Australia also differ by up to 50% (5 prediction classes), with the MAP prediction falling to frequencies of 40 to 50% in areas predicted to be 90 to 100% by the HGHG map. The MAP prediction in this region is informed by two relatively large surveys from the SE Australian coast (n=304<sup>56</sup> and n=788<sup>57</sup>) and three from northern New Zealand, contrasting with the uniform HGHG prediction informed only by data from central Australia. The prediction across much of Africa and Europe is largely concordant between maps. The exact position of the class boundaries across Asia varies slightly, but both show the same general trend of increasing *FY\*A* frequencies eastwards across the continent.

### ***FY\*X* variant: potential further elaboration to the model.**

A number of mutations additional to those encoding the common Duffy variants discussed here (*FY\*A*, *FY\*B*, *FY\*B<sup>ES</sup>*, *FY\*A<sup>ES</sup>*) have been described<sup>58</sup>, most notably the *FY\*X* allele, which reaches polymorphic frequencies among populations of European origin<sup>59</sup>. Despite being relatively common, insufficient data prevented its inclusion in the current mapping project. Additional data on the prevalence of this variant would have allowed extension of the model to include the C265T and G298A loci which encode the *FY\*X* allele in association with the *FY\*B* variant<sup>58</sup>. These mutations cause reduced expression levels of Fy<sup>b</sup> antigen, characterised as the Fy(b+<sup>weak</sup>) phenotype.

The lack of reliable data on this variant is largely due to the low sensitivity of agglutination diagnostics. The low levels of Fy<sup>b</sup> antigen expressed by *FY\*X* (10% wildtype levels<sup>60</sup>) are not consistently or reliably detected by agglutination assays, due to differences in antiserum reactivity and experimental procedures. This inconsistency means that the Fy(b+<sup>weak</sup>) phenotype may occasionally have been misclassified as the Fy(b-) phenotype, overlooking the presence of the Fy<sup>b</sup> antigen.

The *FY\*B* map presented here is, therefore, defined only in terms of expression at two loci for which sufficient data existed for reliable modelling: nucleotide -33 in the promoter GATA-box region and at position 125 of exon 2. Where detected, expression of the *FY\*X* allele is included in the *FY\*B* map, due to its correspondence at the two loci considered. The availability of more multi-locus *Genotype* data would allow full refinement of the model.



## Supplementary Methods

### **Mathematical description of the Bayesian geostatistical model and its implementation.**

This supplement provides information on the geostatistical model used to map the allelic frequencies of the monogenic Duffy blood group variants. General principles of the geostatistical framework used have been previously described by Diggle and Ribeiro<sup>61</sup>.

#### **1. Random fields**

To accommodate the five input data types previously detailed (Table 2), and to simultaneously model the distribution of both the positive alleles,  $FY^*A$  and  $FY^*B$ , and their corresponding negative variants,  $FY^*A^{ES}$  and  $FY^*B^{ES}$ , the model targets two spatially-varying allele frequencies: the frequency of the  $Fy^b$  variant (125A, which is present in both  $FY^*B$  and  $FY^*B^{ES}$ ), and the frequency of the promoter region silencing variant (-33C) in association with the 125A coding region variant (thus the frequency of the  $FY^*B^{ES}$  allele). These are denoted  $p_{ab}(x)$  and  $p_0(x)$  respectively, where  $x$  is a location. A third allele frequency, the frequency of the silencing variant occurring in association with the 125G variant (thus the  $FY^*A^{ES}$  allele) is modelled as a small constant denoted  $p_1$ . This allele's highly restricted distribution, as reported in the assembled database, and its low frequencies where it was detected, prevent its distribution being modelled spatially as for the other alleles. The model for these allele frequencies is as follows:

$$\begin{aligned}
m_{ab} &\sim \text{Normal}(0, 10000) \\
m_0 &\sim \text{Normal}(0, 10000) \\
\beta_{\text{africa}} &\sim \text{Normal}(0, 10000) \\
p_1 &\sim \text{Uniform}(0, .05)
\end{aligned}$$

$$\begin{aligned}
M_{ab}(x) &= \beta_{\text{africa}} \mathbf{1}_{x \text{ in africa}} + m_{ab} \\
M_0(x) &= m_0
\end{aligned}$$

$$\begin{aligned}
\phi_{ab} &\sim \text{Exponential}(.1) \\
\phi_0 &\sim \text{Exponential}(.1) \\
\theta_{ab} &\sim \text{Exponential}(.1) \\
\theta_0 &\sim \text{Exponential}(.1) \\
\nu_{ab} &\sim \text{Uniform}(0, 3) \\
\nu_0 &\sim \text{Uniform}(0, 3) \\
V_{ab} &\sim \text{Exponential}(.1) \\
V_0 &\sim \text{Exponential}(.1)
\end{aligned}$$

$$\begin{aligned}
C_{ab}(x, y) &= \phi_{ab} \text{Matèrn}(d(x, y)/\theta_{ab}; \nu_{ab}) + V_{ab} \mathbf{1}_{x=y} \\
C_0(x, y) &= \phi_0 \text{Matèrn}(d(x, y)/\theta_0; \nu_0) + V_0 \mathbf{1}_{x=y}
\end{aligned}$$

$$\begin{aligned}
f_{ab} &\sim \text{GP}(M_{ab}, C_{ab}) \\
f_0 &\sim \text{GP}(M_0, C_0) \\
p_{ab}(x) &= \text{logit}^{-1}(f_{ab}(x)) \\
p_0(x) &= \text{logit}^{-1}(f_0(x))
\end{aligned}$$

The mean function for  $f_0$  simply returns a constant,  $m_0$ . The mean of  $f_{ab}$  takes presence in sub-Saharan Africa as a covariate with coefficient  $\beta_{\text{africa}}$ , and also a constant term  $m_{ab}$ .

Both fields use the Matèrn covariance function<sup>62</sup>. The range parameters of  $f_0$  and  $f_{ab}$  are  $\theta_0$  and  $\theta_{ab}$ , respectively; the corresponding amplitude parameters are  $\phi_0$  and  $\phi_{ab}$ ; the degree-of-differentiability parameters are denoted  $\nu_0$  and  $\nu_{ab}$ ; and the nugget variances are  $V_0$  and  $V_{ab}$ . The distance function  $d$  gives the great-circle distance between its arguments.

The Gaussian random fields are converted to probabilities using the standard inverse logit link function.

## 2. Likelihood

The probability of the 125A variant being present (variant encoding Fy<sup>b</sup> antigen) is  $p_{ab}(x)$ , and should be much higher for  $x$  in Africa. Given that  $b = 1$ , the promoter region “erythrocyte silent” - 33C variant occurs with probability  $p_0(x)$ . Given that  $b = 0$ , the -33C variant happens with probability  $p_1$ , which is assumed to be a small, constant value (representing the  $FY^*A^{ES}$  allele). Hardy-Weinberg assumptions apply to the genotype frequencies.

Input data falls into five categories: *gen*, *phe*, *prom*, *aphe*, *bphe* defined by the diagnostic method used (Table 1), and thus what phenotypic/genotypic information is discernable. The nomenclature

system used includes a prefix denoting the data category (**gen\***, **phe\***, **prom\***, **aphe\***, **bphe\***) followed by a symbol for each variant: **\*a** for  $FY^*A$  or  $Fy^a$  variant, **\*b** for  $FY^*B$  or  $Fy^b$  variant, allelic variant **\*0** for  $FY^*B^{ES}$ , allelic variant **\*1** for  $FY^*A^{ES}$ , phenotypic variant **\*0** to denote absence. These are fully described as follows:

**gen\*** : Genotype data. Allelic frequencies are:

$$\begin{aligned} \text{gena} & (1 - p_{ab}(x))(1 - p_1) \\ \text{genb} & p_{ab}(x)(1 - p_0(x)) \\ \text{gen0} & p_{ab}(x)p_0(x) \\ \text{gen1} & (1 - p_{ab}(x))p_1 \end{aligned}$$

The genotype frequencies (**genaa** (or  $FY^*A/FY^*A$ ), **genab** (or  $FY^*A/FY^*B$ ), etc.) can be obtained using the standard Hardy-Weinberg formula. For example, the frequency of **genab** is twice the product of the frequencies of **gena** and **genb**, which is  $2(1 - p_{ab}(x))(1 - p_1)p_{ab}(x)(1 - p_0(x))^{63,64}$ .

**phe\*** : Phenotype data. Studies where full phenotype resolution was provided.

|              |                                                                                       |
|--------------|---------------------------------------------------------------------------------------|
| <b>pheab</b> | This can only happen if the genotype is <b>genab</b> .                                |
| <b>phea</b>  | This can only happen if the genotype is <b>gena0</b> , <b>gena1</b> or <b>genaa</b> . |
| <b>pheb</b>  | This can only happen if the genotype is <b>genb0</b> , <b>genb1</b> or <b>genbb</b> . |
| <b>phe0</b>  | This can only happen if the genotype is <b>gen00</b> , <b>gen01</b> or <b>gen11</b> . |

**prom\*** : Molecular data. Studies that considered only the promoter region variant (T-33C).

|               |                                                                                       |
|---------------|---------------------------------------------------------------------------------------|
| <b>prom0</b>  | This can only happen if the genotype is <b>gen00</b> , <b>gen01</b> or <b>gen11</b> . |
| <b>promab</b> | This corresponds to the complement of <b>prom0</b> .                                  |

**aphe\*** : Phenotype data. Only anti-Fya antibody was used in the diagnosis.

|              |                                                                                                      |
|--------------|------------------------------------------------------------------------------------------------------|
| <b>aphea</b> | This can only happen if the genotype is <b>genaa</b> , <b>genab</b> , <b>gena1</b> or <b>gena0</b> . |
| <b>aphe0</b> | This corresponds to the complement of <b>aphea</b> .                                                 |

**bphe\*** : Phenotype data. Only anti-Fyb antibody was used in the diagnosis.

|              |                                                                                                      |
|--------------|------------------------------------------------------------------------------------------------------|
| <b>bpheb</b> | This can only happen if the genotype is <b>genbb</b> , <b>genab</b> , <b>genb0</b> or <b>genb1</b> . |
| <b>bphe0</b> | This corresponds to the complement of <b>bpheb</b> .                                                 |

The sampling distributions are assumed to be multinomial, conditional on the appropriate individual phenotype or genotype probabilities described above. This likelihood completes the Bayesian probability model.

### 3. Model implementation and output

As previously detailed<sup>65</sup>, implementation of the modelling procedure was divided into two computational tasks: (i) the Bayesian inference stage which was implemented using the Markov Chain Monte Carlo (MCMC) algorithm<sup>66</sup> and was used to generate samples from the posterior distribution of the parameter set and the spatial random fields at the data locations; and (ii) a prediction stage in which samples were generated from the posterior distribution of allele frequencies at each prediction location on a global 10 x 10 km grid and 5 x 5 km grid across Africa.

Convergence of the MCMC tracefile was judged by visual inspection and verified using the Geweke convergence diagnostics<sup>67</sup>; 1.2 million MCMC iterations were run, with 10% recorded in the tracefile and the first 30,000 iterations excluded from the mapping stages. During the mapping process, the posterior distributions were thinned by 88, resulting in 1003 mapping iterations. MCMC dynamic traces<sup>66</sup> are available on request.

The model code was written in Python programming language (<http://www.python.org>), and is freely available from the MAP's code repository (<http://github.com/malaria-atlas-project/duffy>). MCMC algorithm<sup>66</sup>, was used from the open-source Bayesian analysis package PyMC<sup>68</sup> (<http://code.google.com/p/pymc>). Maps were generated using Python and Fortran code, available from the MAP's code repository (<http://github.com/malaria-atlas-project/generic-mbg>).

### **Model validation procedure.**

To assess the plausibility of the model's multiple outputs, two validation procedures were run to quantify the disparity between the model's predictions and hold-out subsets of the data<sup>69</sup>. First the frequency of the Duffy negativity phenotype was assessed, a measure determined directly by the  $FY*B^{ES}$  allele frequency map. Second, the frequency of heterozygosity was used to consider the reliability of all three allelic frequency predictions:  $FY*A$ ,  $FY*B$ ,  $FY*B^{ES}$ .

#### **Selection of the validation sets:**

**1. Duffy negativity.** Three of the five input data types (*Genotype*, *Phenotype*, *Promoter*) directly inform the frequency of the negative phenotype. A subset of these three data types corresponding to 10% of the overall dataset (n=84) were randomly selected as a hold-out dataset. The Bayesian geostatistical model was then implemented in full using the remaining 90% dataset.

**2. Heterozygosity.** Only molecularly diagnosed data, which assessed expression at both the promoter and coding-region loci can directly inform the frequency of allelic heterozygosity. This meant that only the *Genotype* data could be used in this hold-out dataset (n=73). Due to the small number of datapoints available, a smaller subset was held-back for validation (n=42), corresponding to 5% of the overall dataset.

#### **Quantifying model performance**

Simple statistical measures were used to quantify the model's ability to predict pixel values at unsampled locations by comparing model predictions with the held-out subset of observed values. The mean error (correlation coefficient between predicted and actual values) was used to assess

overall model bias in the predictions, and mean absolute error (summary of the model's general tendency to over/underestimate frequencies) quantified the overall prediction accuracy as the average magnitude of errors in the predictions<sup>69</sup>.

### **Variability of Duffy typing diagnostic methods.**

Uncertainty in relation to diagnostic methodology may arise due to a number of factors, each is discussed in turn.

First, diagnoses have historically been hampered by shortages of Fy<sup>b</sup> anti-serum, thus leading authors to 'guess' the unknown phenotypes. Across sub-Saharan Africa Fy(a-) samples were assumed to be Duffy negative samples; outside this region, Fy(a-) individuals were assumed to be Fy(b+) (e.g. refs <sup>70-72</sup>). The obvious uncertainty associated with such assumptions was addressed directly through the model design. According to the diagnostic methodology employed, data were categorised into five data types (Table 2) and informed the model accordingly. Our modelling techniques therefore allow use of the complete dataset for each map without requiring any such tenuous assumptions to be made.

Uncertainty may arise, however, due to the inconsistently diagnosed Fy(b+<sup>weak</sup>) phenotype. This low copy-number variant may pass undetected by some antisera during agglutination assays<sup>73</sup>. Ideally, we would have included this additional locus as a spatially-variable term in the model. However, the allele's low frequencies, which are poorly and inconsistently reported, rendered it impossible to map this variant separately. For reasons discussed in Supplementary Discussion 2, the weakly agglutinating samples were treated as the Fy(b+) phenotype.

The second source of diagnostic uncertainty relates directly to the experimental procedures themselves. The main dichotomy between methods in terms of relative reliability is between serological methods (assessing phenotypes) and molecular methods (determining genotypes), corresponding to the greatest potential source of variation. Anticipated levels of variability between phenotypic and genotypic diagnoses can be ascertained from studies examining samples with multiple diagnostics. For example, this was recently done by Ménard *et al* on samples from Madagascar who found perfect concordance between a combination of phenotype-based methods (a microtyping kit and anti-sera, and flow cytometry) and molecular SNP analysis<sup>74</sup> (n = 661). Similar correspondence was reported from the range of diagnoses tested on a Brazilian sample: agglutination tests, flow cytometry analysis and PCR-RFLP DNA analysis and sequencing<sup>75</sup>; the same result was found among UK blood donors<sup>76</sup>. These diagnoses therefore support the commonly cited understanding of a tight phenotype-genotype association with Duffy blood types<sup>76</sup>.

The third aspect of diagnostic uncertainty is introduced by experimental error. However, even poorly preserved blood samples need not necessarily be considered a major source of potential error, due to the remarkable stability of most blood antigens<sup>70</sup>. The ability of the antigens to maintain their integrity over time was demonstrated by the successful agglutination assay applied to six-month old samples from Papua New Guinea<sup>77</sup> and twelve-month old samples from the Maoris of New

Zealand<sup>78</sup>. However, when sample degradation does arise, there is evidence from the literature of such samples being excluded from analyses (e.g. due to poor refrigeration during transport<sup>78</sup>). Furthermore, results described by authors as likely to contain false-positives (e.g. Livingstone *et al* in West Africa<sup>79</sup>) were excluded from the present study to conform with the conservative approach defined in our data abstraction protocols (main manuscript pages 15-17).

We decided not to include diagnostic methodology as a covariate in the model as the model structure already allows for the differences between antigen and DNA-based methods. These were the only two diagnostic types encountered: serological anti-serum agglutination tests (n=659) and DNA-molecular methods (n=162). We therefore considered that little additional information would have been derived from this addition to the model. It is therefore not possible to quantitatively determine the level of variation introduced through synthesis of the different methods; however, we hope to have demonstrated that, within the modelling framework used here, we believe its influence to be very low.

## Supplementary References

52. Lysenko, A. J. & Semashko, I. N. in *Itogi Nauki: Medicinskaja Geografija* (ed. Lebedew, A. W.) 25-146 (Academy of Sciences, USSR, 1968).
53. Piel, F. B. *et al.* Global distribution of the sickle cell gene and geographical confirmation of the malaria hypothesis. *Nat. Commun.* **1**, 104 (2010).
54. Cavalli-Sforza, L. L., Menozzi, P. & Piazza, A. *The History and Geography of Human Genes* (Princeton University Press, 1994).
55. Horton, R. Science will never be the same again. *Lancet* **376**, 143-144 (2010).
56. Mitchell, R. J., Kosten, M. & Deacon, M. Population genetics of blood group polymorphisms in a sample of newborns from Melbourne, Australia. *Hum. Hered.* **36**, 310-316 (1986).
57. Buckton, K., Lai, L. Y. C. & Gibson, J. B. A search for association between gene markers and serum cholesterol, triglyceride, urate and blood pressure. *Ann. Hum. Biol.* **8**, 39-48 (1981).
58. Castilho, L. *et al.* A novel FY allele in Brazilians. *Vox Sang.* **87**, 190-195 (2004).
59. Chown, B., Lewis, M. & Kaita, H. Duffy blood group system in Caucasians - evidence for a new allele. *Am. J. Hum. Genet.* **17**, 384-389 (1965).
60. Yazdanbakhsh, K. *et al.* Molecular mechanisms that lead to reduced expression of Duffy antigens. *Transfusion.* **40**, 310-320 (2000).
61. Diggle, P. J. & Ribeiro, P. J., Jr. *Model-based Geostatistics* (Springer, 2007).
62. Banerjee, S., Carlin, B. P. & Gelfand, A. E. *Hierarchical modeling and analysis for spatial data* (Chapman & Hall, 2003).
63. Hardy, G. H. Mendelian proportions in a mixed population. *Science* **28**, 49-50 (1908).
64. Weinberg, W. Über den nachweis der vererbung beim menschen. *Jahresh. Wuertt. Verh. Vaterl. Naturkd.* **64**, 369-382 (1908).
65. Hay, S. I. *et al.* A world malaria map: *Plasmodium falciparum* endemicity in 2007. *PLoS Med.* **6**, e1000048 (2009).
66. Gilks, W. R., Richardson, S. & Spiegelhalter, D. *Markov chain Monte Carlo in Practice* (Chapman & Hall/CRC, 1995).
67. Geweke, J. in *Bayesian Statistics 4: Proceedings of the Fourth Valencia International Meeting* (eds Bernardo, J. M., J. O. Berger, D. A. P., & A. F. M. Smith) (Oxford University Press, 1992).
68. Patil, A., Huard, D. & Fonnesbeck, C. PyMC: Bayesian stochastic modelling in Python. *J. Stat. Soft.* **35**, 1-81 (2010).
69. Hay, S. I. *et al.* A world malaria map: *Plasmodium falciparum* endemicity in 2007. *PLoS Med.* **6**, e1000048 (2009).
70. Tills, D., Warlow, A., Kopec, A. C., Fridriksson, S. & Mourant, A. E. The blood groups and other hereditary blood factors of the Icelanders. *Ann. Hum. Biol.* **9**, 507-520 (1982).
71. Vyas, G. N., Bhatia, H. M., Banker, D. D. & Purandare, N. M. Study of blood groups and other genetical characters in six Gujarati endogamous groups in Western India. *Ann. Hum. Gen.* **22**, 185-199 (1958).
72. Matson, G. A. & Swanson, J. Distribution of hereditary blood antigens among the Maya and non-Maya Indians in Mexico and Guatemala. *Am. J. Phys. Anthropol.* **17**, 49-74 (1959).
73. Olsson, M. L. *et al.* The Fy(x) phenotype is associated with a missense mutation in the Fy(b) allele predicting Arg89Cys in the Duffy glycoprotein. *Br. J. Haematol.* **103**, 1184-1191 (1998).
74. Ménard, D. *et al.* *Plasmodium vivax* clinical malaria is commonly observed in Duffy-negative Malagasy people. *Proc. Natl. Acad. Sci. USA* **107**, 5967-5971 (2010).
75. Castilho, L. *et al.* A novel FY allele in Brazilians. *Vox Sang.* **87**, 190-195 (2004).

76. Mullighan, C. G., Marshall, S. E., Fanning, G. C., Briggs, D. C. & Welsh, K. I. Rapid haplotyping of mutations in the Duffy gene using the polymerase chain reaction and sequence-specific primers. *Tissue Antigens* **51**, 195-199 (1998).
77. Semple, N. M., Simmons, R. T., Graydon, J. J., Randmae, G. & Jamieson, D. Blood group frequencies in natives of the Central Highlands of New Guinea, and in the Bainings of New Britain. *Med. J. Aust.* **43**, 365-371 (1956).
78. Simmons, R. T., Graydon, J. J., Semple, N. M. & Fry, E. I. A blood group genetical survey in Cook Islanders, Polynesia, and comparisons with American Indians. *Am. J. Phys. Anthropol.* **13**, 667-690 (1955).
79. Livingstone, F. B., Gershowitz, H., Neel, J. V., Zuelzer, W. W. & Solomon, M. D. The distribution of several blood group genes in Liberia, the Ivory Coast and Upper Volta. *Am. J. Phys. Anthropol.* **18**, 161-178 (1960).

### **Sources from which data points were identified. (References 80 to 399)**

Only sources reporting surveys included in the final model are listed. Population samples from these met the inclusion criteria for community representativeness and were geographically specific. References are ordered chronologically, and alphabetically by first author name within years; n=320.

80. Holländer, L. Über die Blutgruppe Duffy und ihre Verteilung in Basel. *Acta. Haematol.* **6**, 257-261 (1951).
81. Race, R. R., Holt, H. A. & Thompson, J. S. The inheritance and distribution of the Duffy blood groups. *Heredity* **5**, 103-110 (1951).
82. Allison, A. C., Hartmann, O., Brendemoen, O. J. & Mourant, A. E. The blood groups of the Norwegian Lapps. *Acta. Pathol. Microbiol. Scand.* **31**, 334-338 (1952).
83. Race, R. R. & Sanger, R. The inheritance of the Duffy blood groups: an analysis of 110 English families. *Heredity* **6**, 111-119 (1952).
84. Pantin, A. M. & Kallsen, R. The blood groups of the Diegueno Indians. *Am. J. Phys. Anthropol.* **11**, 91-96 (1953).
85. Polunin, I. & Sneah, P. H. A. Studies of blood groups in South-East Asia. *J. R. Anthropol. Inst.* **83**, 215-251 (1953).
86. Simmons, R. T., Graydon, J. J. & Sringam, S. A blood group genetical survey in Thais, Bangkok. *Am. J. Phys. Anthropol.* **12**, 407-412 (1954).
87. Matson, G. A., Koch, E. A. & Levine, P. A study of the hereditary blood factors among the Chippewa Indians of Minnesota. *Am. J. Phys. Anthropol.* **12**, 413-426 (1954).
88. Walsh, R. J., Kooptzoff, O., Dunn, D. & Atienza, R. Y. Blood groups of Filipinos. *Oceania* **25**, 61-67 (1954).
89. Simmons, R. T., Graydon, J. J., Semple, N. M. & Fry, E. I. A blood group genetical survey in Cook Islanders, Polynesia, and comparisons with American Indians. *Am. J. Phys. Anthropol.* **13**, 667-690 (1955).
90. Sanger, R., Race, R. R. & Jack, J. The Duffy blood groups of New York negroes: the phenotype Fy (a-b-). *Br. J. Haematol.* **1**, 370-374 (1955).
91. Chown, B. & Lewis, M. The blood groups genes of the Cree Indians and the Eskimos of the Ungawa district of Canada. *Am. J. Phys. Anthropol.* **14**, 215-224 (1956).
92. Nijenhuis, L. E. Blood group frequencies in French Basques. *Hum. Hered.* **6**, 531-535 (1956).
93. Semple, N. M., Simmons, R. T., Graydon, J. J., Randmae, G. & Jamieson, D. Blood group frequencies in natives of the Central Highlands of New Guinea, and in the Bainings of New Britain. *Med. J. Aust.* **43**, 365-371 (1956).
94. Nijenhuis, L. E. & Hoeven, J. A. v. d. Blood group frequencies in Papuans from Biak (Isles of



- Schouten). *Vox Sang.* **1**, 241-249 (1956).
95. Lewis, M., Kaita, H. & Chown, B. The blood groups of a Japanese population. *Am. J. Hum. Genet.* **9**, 274-283 (1957).
  96. Simmons, R. T. & Graydon, J. J. A blood group genetical survey in Eastern and Central Polynesians. *Am. J. Phys. Anthropol.* **15**, 357-366 (1957).
  97. Hulse, F. S. Linguistic barriers to gene-flow: the blood-groups of the Yakima, Okanagon and Swinomish Indians. *Am. J. Phys. Anthropol.* **15**, 235-246 (1957).
  98. Bird, G. W. G., Jayaram, T. K., Ikin, E. W., Mourant, A. E. & Lehmann, H. The blood groups and haemoglobin of the Gorkhas of Nepal. *Am. J. Phys. Anthropol.* **15**, 163-169 (1957).
  99. Junqueira, P. C., Kalmus, H. & Wishart, P. P.T.C. thresholds, colour vision and blood factors of Brazilian Indians, II: Carajas. *Ann. Hum. Genet.* **22**, 22-25 (1957).
  100. Fernandes, J. L. *et al.* P.T.C. thresholds, colour vision and blood factors of Brazilian Indians, I: Kaingangs. *Ann. Hum. Genet.* **22**, 16-21 (1957).
  101. Carcassi, U., Ceppellini, R. & Pitzus, F. Frequenza della talassemia in quattro popolazioni sarde e suoi rapporti con la distribuzione dei gruppi sanguigni e della malaria. *Boll. 1st Sieroter. Milan* **36**, 206-218 (1957).
  102. Alberdi, F., Allison, A. C., Blumberg, B. S., Ikin, E. W. & Mourant, A. E. The blood groups of the Spanish Basques. *J. R. Anthropol. Inst.* **87**, 217-221 (1957).
  103. Ikin, E. W., Mourant, A. E., Kopec, A. C., Moor-Jankowski, J. K. & Huser, H. J. The blood groups of the western Walsers. *Vox Sang.* **2**, 159-174 (1957).
  104. Juel, E. & Vogt, E. The frequency of the Duffy blood group antigens in 1000 Oslo blood donors as defined by anti-Fy. *Acta. Pathol. Microbiol. Scand.* **42**, 150-152 (1958).
  105. Graydon, J. J., Semple, N. M., Simmons, R. T. & Franken, S. Blood groups in pygmies of the Wissellakes in Netherlands New Guinea: with anthropological notes by H. J. T. Bijlmer, University of Amsterdam. *Am. J. Phys. Anthropol.* **16**, 149-171 (1958).
  106. Aksoy, M., Ikin, E. W., Mourant, A. E. & Lehmann, H. Blood groups, haemoglobins, and thalassaemia in Turks in southern Turkey and Eti-Turks. *Br. Med. J.* **2**, 937-939 (1958).
  107. Ruffié, J. Etude séro-anthropologique des populations autochtones du versant nord des Pyrénées. *Bull. Mem. Soc. Anthropol. Paris* **1**, 3-89 (1958).
  108. Hackett, W. & Dawson, G. The distribution of the ABO and simple rhesus (D) blood groups in the Republic of Ireland from a sample of 1 in 37 of the adult population. *Ir. J. Med. Sci.* **33**, 99-109 (1958).
  109. Staveley, J. M. & Douglas, R. Blood groups in Maoris. *J. Polyn. Soc.* **67**, 239-247 (1958).
  110. Matson, G. A. & Swanson, J. Distribution of hereditary blood antigens among the Maya and non-Maya Indians in Mexico and Guatemala. *Am. J. Phys. Anthropol.* **17**, 49-74 (1959).
  111. Gershowitz, H. The Diego factor among Asiatic Indians, Apaches and West African Negroes: blood types of Asiatic Indians and Apaches. *Am. J. Phys. Anthropol.* **17**, 195-200 (1959).
  112. Corcoran, P. A., Allen, F. H., Jr., Allison, A. C. & Blumberg, B. S. Blood groups of Alaskan Eskimos and Indians. *Am. J. Phys. Anthropol.* **17**, 187-193 (1959).
  113. Chown, B. & Lewis, M. The blood group genes of the copper Eskimo. *Am. J. Phys. Anthropol.* **17**, 13-18 (1959).
  114. Kout, M. Bestimmung der Blutgruppen A<sub>1</sub>A<sub>2</sub>BO, MNS, P, Rh/Hr, Kell und Duffy<sup>a</sup> in der Prager Bevölkerung. *Blut* **5**, 205-209 (1959).
  115. Staveley, J. M. & Douglas, R. Blood groups in Tongans (Polynesia). *J. Polyn. Soc.* **68**, 348-353 (1959).
  116. Douglas, R. & Staveley, J. M. The blood groups of Cook Islanders. *J. Polyn. Soc.* **68**, 14-20 (1959).
  117. Bories, S. Étude des groupes sanguins ABO, MN, des types Rh, des antigènes Kell et Duffy et de la sicklémie chez les Tahitiens. *Sang* **30**, 237-244 (1959).
  118. Simmons, R. T., Gajdusek, D. C. & Larkin, L. C. A blood group genetical survey in New Britain. *Am. J. Phys. Anthropol.* **18**, 101-108 (1960).

119. Hulse, F. S. Ripples on a gene-pool: the shifting frequencies of blood-type alleles among the Indians of the Hupa reservation. *Am. J. Phys. Anthropol.* **18**, 141-152 (1960).
120. Chong Duk Won, Shin, H. S., Kim, S. W., Swanson, J. & Albin Matson, G. Distribution of hereditary blood factors among Koreans residing in Seoul, Korea. *Am. J. Phys. Anthropol.* **18**, 115-124 (1960).
121. Allen, F. H., Jr. & Corcoran, P. A. Blood groups of the Penobscot Indians. *Am. J. Phys. Anthropol.* **18**, 109-114 (1960).
122. Buettner-Janusch, J., Gershowitz, H., Pospisil, L. J. & Wilson, P. Blood groups of selected aboriginal and indigenous populations. *Nature* **188**, 153-154 (1960).
123. Hulse, F. S. & Firestone, M. M. in *2nd Int Congr. Hum. Genet.* 845-847.
124. Matson, G. A. & Swanson, J. Distribution of hereditary blood antigens among American Indians in Middle America: Lacandon and other Maya. *Am. Anthropol.* **63**, 1292-1320 (1961).
125. Lewis, M., Hildes, J. A., Kaita, H. & Chown, B. The blood groups of the Kutchin Indians at Old Crow, Yukon Territory. *Am. J. Phys. Anthropol.* **19**, 383-389 (1961).
126. Tejada, C., Sanchez, M., Guzman, M. A., Bregni, E. & Scrimshaw, N. S. Distribution of blood antigens among Guatemalan Indians. *Hum. Biol.* **33**, 319-334 (1961).
127. Douglas, R., Jacobs, J., Sherliker, J. & Staveley, J. M. Blood groups, serum genetic factors, and haemoglobins in Ellice Islanders. *N. Z. Med. J.* **60**, 259-261 (1961).
128. Cavallini, R. Distribuzione del fattore Duffy nella popolazione del Verellese. *Trasfus. Sangue* **6**, 17-22 (1961).
129. Vyas, G. N., Bhatia, H. M., Sukumaran, P. K., Balkrishnan, V. & Sanghvi, L. D. Study of blood groups, abnormal hemoglobins and other genetical characters in some tribes of Gujarat. *Am. J. Phys. Anthropol.* **20**, 255-265 (1962).
130. Simmons, R. T., Tindale, N. B. & Birdsell, J. B. A blood group genetical survey in Australian Aborigines of Bentinck, Mornington and Forsyth Islands, Gulf of Carpentaria. *Am. J. Phys. Anthropol.* **20**, 303-320 (1962).
131. Pollitzer, W. S. Blood types and anthropometry of the Kalmuck Mongols. *Am. J. Phys. Anthropol.* **20**, 11-15 (1962).
132. Layrisse, M., Layrisse, Z. E. & García, J. W. Blood group antigens of the Pemon Indians of Venezuela. *Am. J. Phys. Anthropol.* **20**, 411-420 (1962).
133. Corcoran, P. A., Rabin, D. L. & Allen, F. H., Jr. Blood groups of 237 Navajo school children at Pinon Boarding School, Pinon, Arizona (1961). *Am. J. Phys. Anthropol.* **20**, 389-390 (1962).
134. Best, W. R., Layrisse, M. & Bermejo, R. Blood group antigens in Aymara and Quechua speaking tribes from near Puno, Peru. *Am. J. Phys. Anthropol.* **20**, 321-329 (1962).
135. Silver, R. T., Haber, J. M. & Kellner, A. Blood group studies of jungle Indians of the Mato Grosso. *Transfusion* **2**, 110-114 (1962).
136. Douglas, R., Jacobs, J., Hault, G. E. & Staveley, J. M. Blood groups, serum genetic factors and hemoglobins in Western Solomon Islanders. *Transfusion* **2**, 413-418 (1962).
137. Bartolo, M. d. Incidenza dei fattori Kell, Cellano e Duffy in un campione di popolazione romana. *Acta. Genet. Med. Gemellol. (Roma)* **12**, 291-297 (1963).
138. Layrisse, M., Layrisse, Z. & Wilbert, J. Blood group antigen studies of four Chibchan Tribes. *Am. Anthropol.* **65**, 36-55 (1963).
139. Cooper, A. J., Blumberg, B. S., Workman, P. L. & McDonough, J. R. Biochemical Polymorphic Traits in a U. S. White and Negro Population. *Am. J. Hum. Genet.* **15**, 420-428 (1963).
140. Matson, G. A. & Swanson, J. Distribution of hereditary blood antigens among Indians in Middle America, V: in Nicaragua. *Am. J. Phys. Anthropol.* **21**, 545-559 (1963).
141. Rodríguez, H., H. Rodríguez, A., Loría, A. & Lisker, R. Studies on several genetic hematological traits of the Mexican population, V: distribution of blood group antigens in Nahuas, Yaquis, Tarahumaras, Tarascos and Mixtecos. *Hum. Biol.* **35**, 350-360 (1963).
142. Johnson, R. H., Ikin, E. W. & Mourant, A. E. Blood groups of the Ait Haddidu Berbers of Morocco. *Hum. Biol.* **35**, 514-523 (1963).

143. Ellis, F. R., Cawley, L. P. & Lasker, G. W. Blood groups, hemoglobin types, and secretion of group-specific substance at Hacienda Cayalti, North Peru. *Hum. Biol.* **35**, 26-52 (1963).
144. Nakajima, H., Urano, M. & Jarumilinta, A. The ABO, MNSs, Q, Lewis, Rh, Kell, Duffy, Lutheran and Kidd blood groups of the Thais. *J. Anthropol. Soc. Nippon* **71**, 109-116 (1963).
145. Wickremasinghe, R. L., Ikin, E. W., Mourant, A. E. & Lehmann, H. The blood groups and haemoglobins of the Veddahs of Ceylon. *J. R. Anthropol. Inst.* **93**, 117-125 (1963).
146. Nijenhuis, L. E. Blood group frequencies and haemoglobin types in Tibetans and Nepalese. *Vox Sang.* **8**, 622-626 (1963).
147. Thomas, J. W. *et al.* Blood groups of the Haida Indians. *Am. J. Phys. Anthropol.* **22**, 189-192 (1964).
148. Salzano, F. M. Blood groups of Indians from Santa Catarina, Brazil. *Am. J. Phys. Anthropol.* **22**, 91-106 (1964).
149. Matson, G. A. & Swanson, J. Distribution of hereditary blood antigens among Indians in Middle America, VI: in British Honduras. *Am. J. Phys. Anthropol.* **22**, 271-284 (1964).
150. Buettner Janusch, J., Bove, J. R. & Young, N. Genetic traits and problems of biological parenthood in two Peruvian Indian tribes. *Am. J. Phys. Anthropol.* **22**, 149-154 (1964).
151. Fraser, G. R., Giblett, E. R., Stransky, E. & Motulsky, A. G. Blood groups in the Philippines. *J. Med. Genet.* **38**, 107-109 (1964).
152. Douglas, R., Jacobs, J., Greenbough, R. & Staveley, J. M. Blood groups, serum genetic factors, and hemoglobins in New Hebrides Islanders. *Transfusion* **4**, 177-184 (1964).
153. Anand, S. Filariasis in its relation to A<sub>1</sub>A<sub>2</sub>BO, MN, Kell, Duffy and Rhesus blood groups and secretor factor. *Acta. Genet. Med. Gemellol. (Roma)* **14**, 326-335 (1965).
154. Gawrzewski, W. & Kalczew, J. Studies on the Duffy blood group system (Fya) in the population of Cracow (Poland). *Acta. Med. Pol.* **6**, 255-256 (1965).
155. Nicholls, E. M., Lewis, H. B. M., Cooper, D. W. & Bennett, J. H. Blood group and serum protein differences in some Central Australian Aborigines. *Am. J. Hum. Genet.* **17**, 293-307 (1965).
156. Matson, G. A. & Swanson, J. Distribution of hereditary blood antigens among Indians in Middle America, VIII: In Panama. *Am. J. Phys. Anthropol.* **23**, 413-426 (1965).
157. Matson, G. A. & Swanson, J. Distribution of hereditary blood antigens among Indians in Middle America, VII: in Costa Rica. *Am. J. Phys. Anthropol.* **23**, 107-121 (1965).
158. Barnicot, N. A., Krimoas, C., McConnell, R. B. & Beaven, G. H. A genetical survey of Sphakhia, Crete. *Hum. Biol.* **37**, 274-298. (1965).
159. Fraser, G. R., Giblett, E. R., Lee, T. C. & Motulsky, A. G. Blood and serum groups in Taiwan. *J. Med. Genet.* **42**, 21-23 (1965).
160. Lee, S. Y. Further analysis of Korean blood types. *Yonsei Med. J.* **6**, 16-25 (1965).
161. Nilsson, L. A., Ryttinger, L. & Tibblin, G. Distribution of the ABO, MN, Rh, Duffy and Kell blood groups in a random sample of Swedish men aged fifty. *Acta. Pathol. Microbiol. Scand.* **68**, 117-122 (1966).
162. Walker, M., Allen, F. H., Jr. & Newman, M. T. Blood groups of Cakchiquel Indians from Sumpango, Guatemala. *Am. J. Phys. Anthropol.* **25**, 239-242 (1966).
163. Plato, C. C., Rucknagel, D. L. & Kurland, L. T. Blood group investigations on the Carolinians and Chamorros of Saipan. *Am. J. Phys. Anthropol.* **24**, 147-154 (1966).
164. Matson, G. A., Swanson, J. & Robinson, A. Distribution of hereditary blood groups among Indians in South America, 3: in Bolivia. *Am. J. Phys. Anthropol.* **25**, 13-33 (1966).
165. Matson, G. A., Sutton, H. E., Swanson, J. & Robinson, A. Distribution of hereditary blood groups among Indians in South America, II: in Peru. *Am. J. Phys. Anthropol.* **24**, 325-349 (1966).
166. Walsh, R. J., Murrell, T. G. & Bradley, M. A. A medical and blood group survey of the Lake Kapiago natives. *Archaeol. Phys. Anthropol. Oceania* **1**, 57-66 (1966).
167. Giles, E., Ogan, E., Walsh, R. J. & Bradley, M. A. Blood group genetics of natives of the

- Morobe District and Bougainville, Territory of New Guinea. *Archaeol. Phys. Anthrop. Oceania* **1**, 135-154 (1966).
168. Sunderland, E. & Smith, H. M. The blood groups of the Shi'a in Yazd, Central Iran. *Hum. Biol.* **38**, 50-59. (1966).
169. Maranjian, G., Ikin, E. W., Mourant, A. E. & Lehmann, H. The blood groups and haemoglobins of the Saudi Arabians. *Hum. Biol.* **38**, 394-420 (1966).
170. Plato, C. H. C. & Cruz, M. Blood group and haptoglobin frequencies of the Trukese of Micronesia. *Hum. Hered.* **16**, 74-83 (1966).
171. Roberts, D. F., Evans, M., Ikin, E. W. & Mourant, A. E. Blood groups and the affinities of the Canary Islanders. *Man* **1**, 512-525 (1966).
172. Lister, R. W. *et al.* The blood groups and haemoglobin of the bedouin of Socotra. *Man* **1**, 82-86 (1966).
173. Simmons, R. T., Kidson, C., Gorman, J. G. & Rutgers, C. F. Blood group genetic studies in the Tolai and Sulka of New Britain. *Med. J. Aust.* **2**, 747-751 (1966).
174. Ikemoto, S., Watanabe, S., Ogawa, R. & Furuhashi, T. Frequencies of blood groups among the Vietnamese. *Proc. Jpn. Acad.* **42**, 975-979 (1966).
175. Douglas, R., Jacobs, J., McCarthy, D. D. & Staveley, J. M. Blood group, serum genetic factors, and hemoglobins in Cook Islanders, I: Atiu Island. *Transfusion* **6**, 319-323 (1966).
176. Vetter, O. & Wegner, H. A further case of anti-Fyb and the frequency of Duffy-antigens in the population of the city of Leipzig. *Acta. Genet. Stat. Med.* **17**, 338-340 (1967).
177. Das, S. R., Mukherjee, D. P. & Bhattacharjee, P. N. Survey of the blood groups and PTC taste among the Rajbanshi caste of West Bengal (ABO, MNS, Rh, Duffy and Diego). *Acta. Genet. Stat. Med.* **17**, 433-445 (1967).
178. Gershowitz, H., Junqueira, P. C., Salzano, F. M. & Neel, J. V. Further studies on the Xavante Indians, III: blood groups and ABH-Lea secretor types in the Simoes Lopes and Sao Marcos Xavantes. *Am. J. Hum. Genet.* **19**, 502-513 (1967).
179. Doebelin, T. D. & Mohn, J. F. The blood groups of the Seneca Indians. *Am. J. Hum. Genet.* **19**, 700-712 (1967).
180. Woodd-Walker, R. B., Smith, H. M. & Clarke, V. A. The blood groups of the Timuri and related tribes in Afghanistan. *Am. J. Phys. Anthropol.* **27**, 195-204 (1967).
181. Pollitzer, W. S., Phelps, D. S., Waggoner, R. E. & Leyshon, W. C. Catawba Indians: morphology, genetics, and history. *Am. J. Phys. Anthropol.* **26**, 5-14 (1967).
182. Matson, G. A., Sutton, H. E., Etcheverry, R. B., Swanson, J. & Robinson, A. Distribution of hereditary blood groups among Indians in South America, IV: in Chile with inferences concerning genetic connections between Polynesia and America. *Am. J. Phys. Anthropol.* **27**, 157-193 (1967).
183. Cordova, M. S., Lisker, R. & Loria, A. Studies on several genetic hematological traits of the Mexican population, XII: Distribution of blood group antigens in twelve indian tribes. *Am. J. Phys. Anthropol.* **26**, 55-65 (1967).
184. Montenegro, L. Blood groups in Tucano Indians. *Hum. Biol.* **39**, 89-92 (1967).
185. McKusick, V. A., Bias, W. B., Norum, R. A. & Cross, H. E. Blood groups in two Amish demes. *Humangenetik* **5**, 36-41 (1967).
186. Robinson, J. C., Levene, C., Blumberg, B. S. & Pierce, J. E. Serum alkaline phosphatase types in North American indians and negroes. *J. Med. Genet.* **4**, 96-101 (1967).
187. Nakajima, H. *et al.* The distribution of several serological and biochemical traits in East Asia, II: the distribution of ABO, MNSs, Q, Lewis, Rh, Kell, Duffy and Kidd blood groups in Ryukyu. *Jpn. J. Hum. Genet.* **12**, 29-37 (1967).
188. Simmons, R. T., Gajdusek, D. C., Gorman, J. G., Kidson, C. & Hornabrook, R. W. Presence of the Duffy blood group gene Fy-b demonstrated in Melanesians. *Nature* **213**, 1148-1149 (1967).
189. Etcheverry, R. *et al.* Blood groups in Indians of Tierra del Fuego. *Nature* **214**, 211-212 (1967).

190. Etcheverry, R. Blood groups in natives of Easter Island. *Nature* **216**, 690-691 (1967).
191. Chaudhuri, S., Mukherjee, B., Ghosh, J. & Roychoudhury, A. K. Blood groups of the Chinese in Calcutta. *Nature* **213**, 1245-1245 (1967).
192. Chandanayingyong, D., Sasaki, T. T. & Greenwalt, T. J. Blood groups of the Thais. *Transfusion* **7**, 269-276 (1967).
193. Matson, G. A. *et al.* Distribution of hereditary factors in the blood of Indians of the Gila River, Arizona. *Am. J. Phys. Anthropol.* **29**, 311-337 (1968).
194. Mourant, A. E. *et al.* The hereditary blood factors of some populations in Bhutan. *Anthropologist special vol.*, 29-43 (1968).
195. Simmons, R. T., Graydon, J. J., Curtain, C. C. & Baumgarten, A. Blood group genetic studies in Laiagam. and Mt. Hagen (Iepers), New Guinea. *Archaeol. Phys. Anthropol. Oceania* **3**, 49-54 (1968).
196. Kariks, J. & Walsh, R. J. Some physical measurements and blood groups of the Bainings in New Britain. *Archaeol. Phys. Anthropol. Oceania* **3**, 129-142 (1968).
197. Booth, P. B. & Vines, A. P. Blood groups and other genetic data from the Bismarck Archipelago, New Guinea. *Archaeol. Phys. Anthropol. Oceania* **3**, 64-73 (1968).
198. Booth, P. B. & Oraka, R. E. Blood group frequencies along the South Coast of Papua. *Archaeol. Phys. Anthropol. Oceania* **3**, 146-155 (1968).
199. Johnston, F. E. *et al.* Red cell blood groups of the Peruvian Cashinahua. *Hum. Biol.* **40**, 508-516 (1968).
200. Lechat, M. F. *et al.* A study of various blood group systems in leprosy patients and controls in Cebu, Philippines. *Int. J. Lepr.* **36**, 17-31 (1968).
201. Bhattacharjee, P. N. Further study of Tibetan blood groups. *J. Indian Anthropol. Soc.* **3**, 57-66 (1968).
202. El Hassan, A. M. *et al.* The hereditary blood factors of the Beja of the Sudan. *Man* **3 New Series**, 272-283 (1968).
203. Misawa, S. & Hayashida, Y. On the blood groups among the Ainu in Shizunai, Hokkaido. *Proc. Jpn. Acad.* **44**, 83-88 (1968).
204. Glasgow, B. G. *et al.* The blood groups, serum groups and haemoglobins of the inhabitants of Lunana and Thimbu, Bhutan. *Vox Sang.* **14**, 31-42 (1968).
205. Fraser, G. R. *et al.* Gene frequencies at loci determining blood-group and serum-protein polymorphisms in two villages of northwestern Greece. *Am. J. Hum. Genet.* **21**, 46-60 (1969).
206. Cavalli-Sforza, L. L. *et al.* Studies on African Pygmies, I: a pilot investigation of Babinga Pygmies in the Central African Republic (with an analysis of genetic distances). *Am. J. Hum. Genet.* **21**, 252-274 (1969).
207. Matson, G. A., Sutton, H. E., Swanson, J. & Robinson, A. Distribution of hereditary blood groups among indians in South America, VII: in Argentina. *Am. J. Phys. Anthropol.* **30**, 61-83 (1969).
208. Lisker, R., Cordova, M. S. & Graciela Zarate, Q. B. Studies on several genetic hematological traits of the Mexican population, XVI: Hemoglobin, S and glucose-6-phosphate dehydrogenase deficiency in the east coast. *Am. J. Phys. Anthropol.* **30**, 349-354 (1969).
209. Alfred, B. M., Stout, T. D., Birkbeck, J., Lee, M. & Petrakis, N. L. Blood groups, red cell enzymes, and cerumen types of the Ahousat (Nootka) Indians. *Am. J. Phys. Anthropol.* **31**, 391-398 (1969).
210. Kumar, N. & Mukherjee, D. P. A genetic survey among the Desi Bhumij of Chota Nagpur in Bihar. *Anthropologist special vol.*, 75-83 (1969).
211. Bhattacharjee, P. N. A genetical study of the Santals of Santal Parganas. *Anthropologist special vol.*, 93-103 (1969).
212. Simmons, R. T. & Cooke, D. R. Population genetic studies in Australian aborigines of the Northern Territory: blood group genetic studies in the Malag of Elcho Island. *Archaeol. Phys. Anthropol. Oceania* **4**, 252-259 (1969).

213. Salazar-Mallén, M., Amezcua-Chavarría, E. & Mitrani-Levy, D. Estudios sobre la atopía en Mexico: los grupos eritrocitarios y el serológico Gm (1) en la población normal y en la atópica. *Gac. Med. Mex.* **99**, 730-735 (1969).
214. Harvey, R. G., Godber, M. J., Kopec, A. C., Mourant, A. E. & Tills, D. Frequency of genetic traits in the Caribs of Dominica. *Hum. Biol.* **41**, 342-364 (1969).
215. Bajatzadeh, M. & Walter, H. Investigations on the distribution of blood and serum groups in Iran. *Hum. Biol.* **41**, 401-415 (1969).
216. Staveley, J. M., Tinielu, I. & Douglas, R. Blood groups and serum genetic factors in Tokelau islanders. *N. Z. Med. J.* **70**, 238-242 (1969).
217. Harrison, G. A. *et al.* The effects of altitudinal variation in Ethiopian populations. *Philos. Trans. R. Soc. Lond. B Biol. Sci.* **256**, 147-182 (1969).
218. Matznetter, T. & Spielmann, W. Blutgruppen moçambiquanischer Bantustämme. *Z. Morphol. Anthropol.* **61**, 57-71 (1969).
219. Skov, F., Eriksen, M. & Hagerup, L. Distribution of the ABO, MNS, P, Rhesus, Lutheran, Kell, Lewis and Duffy blood groups and frequency of irregular red cell antibodies in a population of Danes aged fifty years and a population of Danes aged seventy years. From the Glostrup population studies. *Acta. Pathol. Microbiol. Scand. B Microbiol. Immunol.* **78**, 553-559 (1970).
220. Niswander, J. D., Brown, K. S., Iba, B. Y., Leyshon, W. C. & Workman, P. L. Population studies on southwestern Indian tribes, I: History, culture, and genetics of the Papago. *Am. J. Hum. Genet.* **22**, 7-23 (1970).
221. Juberg, R. C. Blood-group gene frequencies in West Virginia. *Am. J. Hum. Genet.* **22**, 96-99 (1970).
222. Gershowitz, H. *et al.* Gene frequencies and microdifferentiation among the Makiritare Indians, I: eleven blood group systems and the ABH-Le secretor traits: a note on Rh gene frequency determinations. *Am. J. Hum. Genet.* **22**, 515-525 (1970).
223. Pollitzer, W. S. *et al.* The Seminole Indians of Florida: morphology and serology. *Am. J. Phys. Anthropol.* **32**, 65-81 (1970).
224. Pollitzer, W. S., Namboodiri, K. K., Elston, R. C., Brown, W. H. & Leyshon, W. C. The Seminole Indians of Oklahoma: morphology and serology. *Am. J. Phys. Anthropol.* **33**, 15-29 (1970).
225. Erickson, R. P., Nerlove, S., Creger, W. P. & Romney, A. K. Comparison of genetic and anthropological interpretations of population isolates in Aguacatenango, Chiapas, Mexico. *Am. J. Phys. Anthropol.* **32**, 105-120 (1970).
226. Alfred, B. M., Stout, T. D., Lee, M., Birkdeck, J. & Petrakis, N. L. Blood groups, phosphoglucomutase, and cerumen types of the Anahan (Chilcotin) Indians. *Am. J. Phys. Anthropol.* **32**, 329-338 (1970).
227. Stanhope, J. M. & Booth, P. B. The Kire people, Madang district, New Guinea: blood groups, haptoglobin and transferring types. *Archaeol. Phys. Anthropol. Oceania* **5**, 157-162 (1970).
228. Bonne, B. *et al.* The Habbanite isolate, I: Genetic markers in the blood. *Hum. Hered.* **20**, 609-622 (1970).
229. Spielmann, W., Teixidor, D., Renninger, W. & Matznetter, T. Blutgruppen und Lepra bei moçambiquanischen Völkerschaften. *Humangenetik* **10**, 304-317 (1970).
230. Cabannes, R. *et al.* Etude hématologique et biologique des Attié du village d'Atiékwá. *Med. Afr. Noire* **17**, 835-841 (1970).
231. Cunha, A. X. d. & Cunha, F. A. F. X. d. Grupos sanguíneos da populacao Macua da Ilha de Mocambique (Sistema A<sub>1</sub>A<sub>2</sub>BO, MN, CDE e Duffy). *Rev. Ecuat. Med. Cienc. Biol.* **3**, 97-107 (1970).
232. Bonné, B., Godber, M., Ashbel, S., Mourant, A. E. & Tills, D. South-Sinai Beduin: a preliminary report on their inherited blood factors. *Am. J. Phys. Anthropol.* **34**, 397-408 (1971).
233. Lowe, R. F., Gadd, K. G., Chitiyo, M. E., Emmanuel, J. & Robertson, T. The MN, P, Kell and Duffy blood group systems of the Zezuru tribe of Rhodesia. *Cent. Afr. J. Med.* **17**, 207-209

- (1971).
234. Salzano, F. M. *et al.* Blood groups and H-Le a salivary secretion of Brazilian Cayapo Indians. *Am. J. Phys. Anthropol.* **36**, 417-425 (1972).
  235. Sorgo, G. & Piso, C. Das System Duffy: Genfrequenzen und Familienuntersuchung. *Blut* **24**, 89-93 (1972).
  236. Warwick, R., Raynes, A. E., Ikin, E. W. & Mourant, A. E. The blood groups of the inhabitants of Lipari (Aeolian Islands, Italy). *Hum. Biol.* **44**, 649-654 (1972).
  237. Spielmann, W., Teixidor, D. & Matznetter, T. Blutgruppen bei Bantu Populationen aus Angola zugleich ein Beitrag zur Berechnung der Vaterschaftswarscheinlichkeit bei Gutachten mit Negern als Eventualvätern. *Blut* **27**, 322-335 (1973).
  238. Hawkins, B., Elliot, M., Kosasih, E. N. & Simons, M. J. Red cell genetic studies of the Toba Bataks of North Sumatra. *Hum. Biol. Oceania* **2**, 147-154 (1973).
  239. Hakim, S. M. A., Baxi, A. J. & Balakrishnan, V. Blood groups, secretor status and ability to taste phenylthiocarbamide in some Muslim groups. *Hum. Hered.* **23**, 72-77 (1973).
  240. Eriksson, A. W., Eskola, M.-R., Workman, P. L. & Morton, N. E. Population studies on the Aland Islands, II: historical population structure: inference from bioassay of kinship and migration. *Hum. Hered.* **23**, 511-534 (1973).
  241. Arends, T., Gallango, M. L., Muller, A., Gonzalez-Marroro, M. & Perez Bandez, O. in *International Congress on Anthropological and Ethnological Sciences*. 1.
  242. Sunderland, E. & Coope, E. Biological studies of Yemenite and Kurdish Jews in Israel and other groups in south-west Asia, XII: genetic studies in Jordan. *Philos. Trans. R. Soc. Lond. B Biol. Sci.* **266**, 207-220 (1973).
  243. Lehmann, H. *et al.* Biological studies of Yemenite and Kurdish Jews in Israel and other groups in south-west Asia, XI: the hereditary blood factors of the Kurds of Iran. *Philos. Trans. R. Soc. Lond. B Biol. Sci.* **266**, 195-205 (1973).
  244. Geerdink, R. A., Nijenhuis, L. E., Van Loghem, E. & Li Fo Sjoie, E. Blood groups and immunoglobulin groups in trio and Wajana Indians from Surinam. *Am. J. Hum. Genet.* **26**, 45-53 (1974).
  245. Kirk, R. L., McDermid, E. M. & Blake, N. M. Blood group, serum protein and red cell enzyme groups of Amerindian populations in Colombia. *Am. J. Phys. Anthropol.* **41**, 301-316 (1974).
  246. Crawford, M. H., Leyshon, W. C. & Brown, K. Human biology in Mexico, II: A comparison of blood group, serum and red cell enzyme frequencies, and genetic distances of the Indian populations of Mexico. *Am. J. Phys. Anthropol.* **41**, 251-268 (1974).
  247. Brown, S. M., Gajdusek, D. C. & Leyshon, W. C. Genetic studies in Paraguay: blood group, red cell, and serum genetic patterns of the Guayaki and Ayore Indians, Mennonite settlers, and seven other Indian tribes of the Paraguayan Chaco. *Am. J. Phys. Anthropol.* **41**, 317-343 (1974).
  248. Roberts, D. F., Papiha, S. S. & Creen, C. K. Red cell enzyme and other polymorphic systems in Madhya Pradesh, Central India. *Ann. Hum. Biol.* **1**, 159-174 (1974).
  249. Mourant, A. E. *et al.* The blood groups and haemoglobins of the Kunama and Baria of Eritrea, Ethiopia. *Ann. Hum. Biol.* **1**, 383-392 (1974).
  250. Misawa, S., Ohno, N., Ishimoto, G. & Omoto, K. The distribution of genetic markers in blood samples from Okinawa, the Ryukyus, I: the distribution of red cell antigen groups in Ishigaki Island. *J. Anthropol. Soc. Nippon* **82**, 135-143 (1974).
  251. Salmon, D. & Yvart, J. Fréquences géniques de 17 systèmes de polymorphisme: étude sur un échantillon de sujets vivant dans la région parisienne. *Rev. Franc. Trans.* **17**, 295-304 (1974).
  252. Nurse, G. T. & Jenkins, T. The Griqua of Campbell, Cape Provice, South Africa. *Am. J. Phys. Anthropol.* **43**, 71-78 (1975).
  253. Szathmary, E. J., Mohn, J. F. & Gershowitz, H. The Northern and Southeastern Ojibwa: blood group systems and the causes of genetic divergence. *Hum. Biol.* **47**, 351-368 (1975).
  254. Chakraborty, R., Das, S. K. & Roy, M. Blood group genetics of some caste groups of Southern

- 24 Parganas, West Bengal. *Hum. Hered.* **25**, 218-225 (1975).
255. Nurse, G. T., Lane, A. B. & Jenkins, T. Sero-genetic studies on the Dama of South West Africa. *Ann. Hum. Biol.* **3**, 33-50 (1976).
256. Hiernaux, J. Blood polymorphism frequencies in the Sara Majingay of Chad. *Ann. Hum. Biol.* **3**, 127-140 (1976).
257. Godber, M. *et al.* The blood groups, serum groups, red-cell isoenzymes and haemoglobins of the Sandawe and Nyaturu of Tanzania. *Ann. Hum. Biol.* **3**, 463-473 (1976).
258. Cartwright, R. A. Unifactorially inherited attributes of the population of Holy Island, Northumberland. *Ann. Hum. Biol.* **3**, 351-362 (1976).
259. Basu, A. *et al.* Morphology, serology, dermatoglyphics, and microevolution of some village populations in Haiti, West Indies. *Hum. Biol.* **48**, 245-269 (1976).
260. Kojić, T. *et al.* Possible genetic predisposition for alcohol addiction. *Adv. Exp. Med. Biol.* **85**, 7-24 (1977).
261. Salzano, F. M., Neel, J. V., Gershowitz, H. & Migliazza, E. C. Intra and intertribal genetic variation within a linguistic group: the Ge-speaking indians of Brazil. *Am. J. Phys. Anthropol.* **47**, 337-347 (1977).
262. Tills, D., Teesdale, P. & Mourant, A. E. Blood groups of the Irish. *Ann. Hum. Biol.* **4**, 23-24 (1977).
263. Nurse, G. T. & Jenkins, T. Serogenetic studies on the Kavango peoples of South West Africa. *Ann. Hum. Biol.* **4**, 465-478 (1977).
264. Hiorns, R. W., Harrison, G. A. & Gibson, J. B. Genetic variation in some Oxfordshire villages. *Ann. Hum. Biol.* **4**, 197-210 (1977).
265. Levine, M. H., Von Hagen, V., Ruffie, J. & Darrasse, H. A hematological approach to Basque isolation in two French Basque Villages. *Ann. N. Y. Acad. Sci.* **293**, 185-193 (1977).
266. Neel, J. V. *et al.* Genetic studies of the Macushi and Wapishana Indians, II: data on 12 genetic polymorphisms of the red cell and serum proteins: gene flow between the tribes. *Hum. Genet.* **37**, 207-219 (1977).
267. Nurse, G. T., Botha, M. C. & Jenkins, T. Sero-genetic studies on the San of South West Africa. *Hum. Hered.* **27**, 81-98 (1977).
268. Colino, F., Campillo, F. L., Toledano, J. A. & Senra, A. Distribución de los grupos del sistema sanguíneo Duffy en la población española. *Sangre (Barc)* **22**, 30-32 (1977).
269. Welch, S. G., McGregor, I. A. & Williams, K. The Duffy blood group and malaria prevalence in Gambian West Africans. *Trans. R. Soc. Trop. Med. Hyg.* **71**, 295-296 (1977).
270. Papiha, S. S., Roberts, D. F., Mukerjee, D. P., Singh, S. D. & Malhotra, M. A genetic survey in the Bhil tribe of Madhya Pradesh, Central India. *Am. J. Phys. Anthropol.* **49**, 179-185 (1978).
271. Spencer, H. C. *et al.* The Duffy blood group and resistance to *Plasmodium vivax* in Honduras. *Am. J. Trop. Med. Hyg.* **27**, 664-670 (1978).
272. Roberts, D. F. & Papiha, S. S. Les polymorphismes génétiques des Sukuma (Tanzanie). *Anthropologie* **82**, 565-574 (1978).
273. Salzano, F. M. *et al.* Unusual blood genetic characteristics among the Ayoreo Indians of Bolivia and Paraguay. *Hum. Biol. Oceania* **50**, 121-136 (1978).
274. Beckman, L., Cedergren, B., Perris, C. & Strandman, E. Blood groups and affective disorders. *Hum. Hered.* **28**, 48-55 (1978).
275. Sukernik, R. I., Karaphet, T. M. & Osipova, L. P. Distribution of blood groups, serum markers and red cell enzymes in two human populations from Northern Siberia. *Hum. Hered.* **28**, 321-327 (1978).
276. Le Petit, J. C. *et al.* Analyse génétique d'une population présentant des anomalies de fréquence génique. *Rev. Fr. Transfus. Immunohematol.* **21**, 921-933 (1978).
277. Nurse, G. T., Jenkins, T., David, J. H. & Steinberg, A. G. The Njinga of Angola: a serogenetic study. *Ann. Hum. Biol.* **6**, 337-348 (1979).
278. Beaumont, B., Nurse, G. T. & Jenkins, T. Highland and lowland populations of Lesotho. *Hum.*



- Hered.* **29**, 42-49 (1979).
279. Martin, S. K. *et al.* Frequency of blood group antigens in Nigerian children with falciparum malaria. *Trans. R. Soc. Trop. Med. Hyg.* **73**, 216-218 (1979).
280. Sandler, S. G. *et al.* The Duffy blood group system in Israeli Jews and Arabs. *Vox Sang.* **37**, 41-46 (1979).
281. Salzano, F. M. *et al.* The Caingang revisited: blood genetics and anthropometry. *Am. J. Phys. Anthropol.* **53**, 513-524 (1980).
282. Saha, N. *et al.* Some blood genetic markers of selected tribes in western Saudi Arabia. *Am. J. Phys. Anthropol.* **52**, 595-600 (1980).
283. Kamel, K., Chandy, R., Mousa, H. & Yunis, D. Blood groups and types, hemoglobin variants, and G-6-PD deficiency among Abu Dhabians in the United Arab Emirates. *Am. J. Phys. Anthropol.* **52**, 481-484 (1980).
284. Black, F. L. *et al.* Restriction and persistence of polymorphisms of HLA and other blood genetic traits in the Parakana Indians of Brazil. *Am. J. Phys. Anthropol.* **52**, 119-132 (1980).
285. Wasfi, A. I., Saha, N., El Munshid, H. A., El Sheikh, F. S. & Ahmed, M. A. Genetic association in vitiligo: ABO, MNSs, Rhesus, Kell and Duffy blood groups. *Clin. Genet.* **17**, 415-417 (1980).
286. Armanet, L. *et al.* Frecuencia de los sistemas Rh, MNSs, Duffy, Diego, Kell, Lutheran y Xg en Chile. *Rev. Med. Chil.* **108**, 103-108 (1980).
287. Sukernik, R. I., Lemza, S. V., Karaphet, T. M. & Osipova, L. P. Reindeer Chukchi and Siberian Eskimos: studies on blood groups, serum proteins, and red cell enzymes with regard to genetic heterogeneity. *Am. J. Phys. Anthropol.* **55**, 121-128 (1981).
288. Ferrell, R. E., Chakraborty, R., Gershowitz, H., Laughlin, W. S. & Schull, W. J. The St. Lawrence Island Eskimos: genetic variation and genetic distance. *Am. J. Phys. Anthropol.* **55**, 351-358 (1981).
289. Crawford, M. H., Mielke, J. H., Devor, E. J., Dykes, D. D. & Polesky, H. F. Population structure of Alaskan and Siberian indigenous communities. *Am. J. Phys. Anthropol.* **55**, 167-185 (1981).
290. Buckton, K., Lai, L. Y. C. & Gibson, J. B. A search for association between gene markers and serum cholesterol, triglyceride, urate and blood pressure. *Ann. Hum. Biol.* **8**, 39-48 (1981).
291. Spedini, G. *et al.* Some genetic erythrocyte polymorphisms in the Mbugu and other populations of the Central African Republic with an analysis of genetic distances. *Anthropol. Anz.* **39**, 10-19 (1981).
292. Mourant, A. E. *et al.* Red cell antigen, serum protein, and red cell enzyme polymorphisms in inhabitants of the Jimi Valley, Western Highlands, New Guinea. *Hum. Genet.* **59**, 77-80 (1981).
293. Colauto, E. M. *et al.* Malária no município de Humaitá, estado do Amazonas, XII: frequência de fatores de resistência eritrocitária na população geral e em doentes: hemoglobina S e sistema sanguíneo Duffy. *Rev. Inst. Med. Trop. Sao Paulo* **23**, 72-78 (1981).
294. Barrantes, R., Smouse, P. E., Neel, J. V., Mohrenweiser, H. W. & Gershowitz, H. Migration and genetic infrastructure of the central American Guaymi and their affinities with other tribal groups. *Am. J. Phys. Anthropol.* **58**, 201-214 (1982).
295. Tills, D., Warlow, A., Kopec, A. C., Fridriksson, S. & Mourant, A. E. The blood groups and other hereditary blood factors of the Icelanders. *Ann. Hum. Biol.* **9**, 507-520 (1982).
296. Tills, D. *et al.* Blood group, protein, and red cell enzyme polymorphisms of the Hadza of Tanzania. *Hum. Genet.* **61**, 52-59 (1982).
297. Breguet, G. *et al.* Genetic survey of an isolated community in Bali, Indonesia, I: blood groups, serum proteins and hepatitis B serology. *Hum. Hered.* **32**, 52-61 (1982).
298. Booth, P. B. *et al.* Red cell antigen, serum protein and red cell enzyme polymorphisms in Karkar Islanders and inhabitants of the adjacent north coast of New Guinea. *Hum. Hered.* **32**, 385-403 (1982).
299. Rouger, P., Ruffie, J., Gueguen, A., Golmard, J. L. & Salmon, D. Human-blood groups of the Chinese population of Macau, I: blood-groups Abo, Rhesus, Mnss, Kidd, Duffy and Diego. *J.*

- Hum. Evol.* **11**, 481-486 (1982).
300. Soustelle, B., Rubio, F., Coves, F. & Bizot, M. Phénotypage Kell et Duffy par une technique de coagglutination sur Groupmatic G 360. *Rev. Fr. Transfus. Immunoematol.* **25**, 309-319 (1982).
  301. Szathmary, E. J. E. Dogrib Indians of the Northwest Territories, Canada: genetic diversity and genetic relationship among subarctic Indians. *Ann. Hum. Biol.* **10**, 147-162 (1983).
  302. Woolley, V., Gill, P. S. & Sunderland, E. Blood groups, haptoglobins and red cell isoenzymes of the Jat Sikhs of Ludhiana District, Panjab, India. *Hum. Hered.* **33**, 44-51 (1983).
  303. Wolanski, N., Nahar, R. A. & Roberts, D. F. Genetic studies in Poland. *Hum. Hered.* **33**, 270-276 (1983).
  304. Cedergren, B., Nordenson, I. & Beckman, L. Population studies in northern Sweden, XI: the Duffy blood group polymorphism. *Hum. Hered.* **33**, 365-370 (1983).
  305. Schliwa, R., Gilbert, K., Walter, H. & Dannewitz, A. Serological-genetic investigations on some populations of the northern Aegean Sea (Greece). *J. Hum. Evol.* **12**, 769-773 (1983).
  306. Youinou, P. *et al.* An analysis of the blood group composition of a population in Brittany, the Bigoudens. *Rev. Fr. Transfus. Immunoematol.* **26**, 359-368 (1983).
  307. Paul, B. Duffy blood group distribution in Malawi. *Trans. R. Soc. Trop. Med. Hyg.* **77**, 877 (1983).
  308. Rothhammer, F., Goedde, H. W., Llop, E., Acuna, M. & Carvajal, P. Erythrocyte and HLA antigens of Atacameno Indians. *Am. J. Phys. Anthropol.* **65**, 243-247 (1984).
  309. Yida, Y. *et al.* Distribution of eight blood-group systems and ABH secretion in Mongolian, Korean, and Zhuang nationalities in China. *Ann. Hum. Biol.* **11**, 377-388 (1984).
  310. Sawhney, K. S., Sunderland, E. & Woolley, V. Genetic polymorphisms in the Kuwaiti Arabs. *Hum. Hered.* **34**, 303-307 (1984).
  311. Ohkura, K. *et al.* Distribution of polymorphic traits in Mazandarani and Gilani in Iran. *Hum. Hered.* **34**, 27-39 (1984).
  312. Salzano, F. M. Incidence, effects, and management of sickle cell disease in Brazil. *Am. J. Pediatr. Hematol. Oncol.* **7**, 240-244 (1985).
  313. Ferrell, R. E., Salamatina, N. V., Dalakishvili, S. M., Bakuradze, N. A. & Chakraborty, R. A population genetic study in the Ochamchir region, Abkhazia, USSR. *Am. J. Phys. Anthropol.* **66**, 63-71 (1985).
  314. Salzano, F. M. *et al.* Population structure and blood genetics of the Pacaas Novos Indians of Brazil. *Ann. Hum. Biol.* **12**, 241-249 (1985).
  315. Clegg, E. J., Tills, D., Warlow, A., Wilkinson, J. & Marin, A. Blood group variation in the Isle of Lewis. *Ann. Hum. Biol.* **12**, 345-361 (1985).
  316. Swart, J. & Pribilla, O. Das Duffy-System: eine populationsgenetische Untersuchung in Portugal, Guinea-Bissau und Brasilien. *Anthropol. Anz.* **43**, 285-297 (1985).
  317. Kulkarni, A. G., Ibazebo, R. O., Dunn, D. T. & Fleming, A. F. Some red cell antigens in the Hausa population of northern Nigeria. *Hum. Hered.* **35**, 283-287 (1985).
  318. Salzano, F. M. *et al.* Demography and genetics of the Satere-Mawe and their bearing on the differentiation of the Tupi tribes of South America. *J. Hum. Evol.* **14**, 647-655 (1985).
  319. Bestetti, A., Cazzaniga, G., Ripamonti, M. & Assali, G. Risultati della tipizzazione antigenica eritrocitaria in un campione della popolazione del circondario di Monza, I: sistemi diallelici eritrocitari Kell, Lutheran, Duffy, Kidd, P. *Riv. Emoter. Immunoematol.* **32**, 17-40 (1985).
  320. Singh, K. S. *et al.* Genetic markers among Meiteis and Brahmins of Manipur, India. *Hum. Hered.* **36**, 177-187 (1986).
  321. Mitchell, R. J., Kosten, M. & Deacon, M. Population genetics of blood group polymorphisms in a sample of newborns from Melbourne, Australia. *Hum. Hered.* **36**, 310-316 (1986).
  322. Harvey, R. G., Smith, M. T., Sherren, S., Bailey, L. & Hyndman, S. J. How Celtic are the Cornish? A study of biological affinities. *Man* **21**, 177-201 (1986).
  323. Mahmoud, L. A., Ibrahim, A. A., Ghonem, H. R. & Jouvenceaux, A. Human blood groups in

- Dakahlya, Egypt. *Ann. Hum. Biol.* **14**, 487-493 (1987).
324. Jenkins, T., Speirs, J., Dunn, D. S. & Nurse, G. T. Serogenetic and haematological studies on the Kgalagadi of Botswana. *Ann. Hum. Biol.* **14**, 143-153 (1987).
325. Jin, F., Hao, L. & Du, R. Distribution of red cell blood group systems in Bai and Hani in China. *Gene Geogr.* **1**, 163-168 (1987).
326. Ai, Q., Yuan, Y., Zhao, H., Li, S. & Du, R. Distribution of red cell blood group systems in Yi, Tibetan and Manchu ethnic groups in China. *Gene Geogr.* **1**, 169-176 (1987).
327. Sistonen, P., Koistinen, J. & Aden Abdulle, O. Distribution of blood groups in the East African Somali population. *Hum. Hered.* **37**, 300-313 (1987).
328. Salzano, F. M. *et al.* Genetic variation within a linguistic group: Apalai-Wayana and other Carib tribes. *Am. J. Phys. Anthropol.* **75**, 347-356 (1988).
329. Nevo, S. Genetic blood markers in Arab Druze of Israel. *Am. J. Phys. Anthropol.* **77**, 183-190 (1988).
330. Lisker, R., Pérez-Briceno, R., Granados, J. & Babinsky, V. Gene frequencies and admixture estimates in the state of Puebla, Mexico. *Am. J. Phys. Anthropol.* **76**, 331-335 (1988).
331. Aireche, H. & Benabadji, M. Rh and Duffy gene frequencies in Algeria. *Gene Geogr.* **2**, 1-8 (1988).
332. Hoang, B. *et al.* An analysis of the blood group composition of the North Vietnam population. *Int. J. Anthropol.* **3**, 63-70 (1988).
333. Iyengar, S. *et al.* Genetic studies of type 2 (non-insulin-dependent) diabetes mellitus: lack of association with seven genetic markers. *Diabetologia* **32**, 690-693 (1989).
334. Yung, C. H. *et al.* Blood group phenotypes in Taiwan. *Transfusion* **29**, 233-235 (1989).
335. Schliwa, R., Dannewitz, A., Gilbert, K. & Walter, H. Genetic studies in four populations of the northern Aegean Sea, Greece. *Z. Morphol. Anthropol.* **78**, 89-106 (1989).
336. Saha, N., Tay, J. S., Tsoi, W. F. & Kua, E. H. Association of Duffy blood group with schizophrenia in Chinese. *Genet. Epidemiol.* **7**, 303-305 (1990).
337. Nasidze, I. S. *et al.* Genetika narodonaseleniia Kavkaza: raspredelenie nekotorykh immunologicheskikh i biokhimicheskikh markerov v Vostochnoi Gruzii. *Genetika* **26**, 936-945 (1990).
338. Insaridze, Z. P. *et al.* Genetika narodonaseleniia Kavkaza: raspredelenie nekotorykh immunologicheskikh i biokhimicheskikh markerov v Zapadnoi Gruzii. *Genetika* **26**, 1092-1101 (1990).
339. Lisker, R., Ramirez, E., Briceño, R. P., Granados, J. & Babinsky, V. Gene frequencies and admixture estimates in four Mexican urban centers. *Hum. Biol.* **62**, 791-801 (1990).
340. Picornell, A., Castro, J. A. & Ramon, M. M. Blood groups in the Chueta community (Majorcan Jews). *Hum. Hered.* **41**, 35-42 (1991).
341. Daher, V., Youlton, R., Nazer, J. & Cifuentes, L. Estudio genetico en gemelos. *Rev. Chil. Pediatr.* **62**, 23-28 (1991).
342. Acuña, M. *et al.* Evidencias genéticas corroboran la hipótesis de Neghme sobre la mayor benignidad de la tripanosomiasis Americana en Chile. *Rev. Med. Chil.* **120**, 233-238 (1992).
340. Walter, H. *et al.* Investigations on the variability of blood group polymorphisms among sixteen tribal populations from Orissa, Madhya Pradesh and Maharashtra, India. *Z. Morphol. Anthropol.* **79**, 69-94 (1992).
344. Salamatina, N. M. & Nasidze, I. S. Genetic polymorphisms in a rural Osetian community. *Gene Geogr.* **7**, 251-255 (1993).
345. Sans, M. *et al.* Blood-Group Frequencies and the Question of Race Admixture in Uruguay. *Interciencia* **18**, 29-32 (1993).
346. Verma, I. C. & Thakur, A. Duffy Blood-Group Determinants and Malaria in India. *J. Genet.* **72**, 15-19 (1993).
347. Hao, L., Liu, J., Li, M., Jin, S. & Du, R. Distribution of red cell blood groups in Han subpopulations of Inner Mongolia, Gansu and Henan Provinces, China. *Gene Geogr.* **8**, 175-

- 184 (1994).
348. Brindle, P. M., Maitland, K., Williams, T. N. & Ganczakowski, M. E. A survey for the rare blood group antigen variants, En(a-), Gerbich negative and Duffy negative on Espiritu Santo, Vanuatu in the South Pacific. *Hum. Hered.* **45**, 211-214 (1995).
  349. Callegari-Jacques, S. M. *et al.* The Wai Wai Indians of South America: history and genetics. *Ann. Hum. Biol.* **23**, 189-201 (1996).
  350. Janicijevic, B., Bakran, M., Martinovic, I. & Roberts, D. F. Serogenetic polymorphisms of the four middle Dalmatian island and peninsular population isolates. *Coll. Antropol.* **20**, 47-54 (1996).
  351. Pinto, F., Rando, J. C., Lopez, M., Morilla, J. M. & Larruga, J. M. Blood group polymorphisms in the Canary Islands. *Gene Geogr.* **10**, 171-179 (1996).
  352. Picornell, A. *et al.* Genetic variation in the population of Ibiza (Spain): genetic structure, geography, and language. *Hum. Biol.* **68**, 899-913 (1996).
  353. Salzano, F. M. *et al.* The Brazilian Xavante Indians revisited: new protein genetic studies. *Am. J. Phys. Anthropol.* **104**, 23-34 (1997).
  354. Schnackenberg, L., Flesch, B. K. & Neppert, J. Linkage disequilibria between Duffy blood groups, Fc gamma IIa and Fc gamma IIIb allotypes. *Exp. Clin. Immunogenet.* **14**, 235-242 (1997).
  355. Nabulsi, A. J., Cleve, H. & Rodewald, A. Serological analysis of the Abbad tribe of Jordan. *Hum. Biol.* **69**, 357-373 (1997).
  356. Nanu, A. & Thapliyal, R. M. Blood group gene frequency in a selected north Indian population. *Indian J. Med. Res.* **106**, 242-246 (1997).
  357. Santos, S. E. *et al.* New protein genetic studies in six Amazonian Indian populations. *Ann. Hum. Biol.* **25**, 505-522 (1998).
  358. Harb, Z., Llop, E., Moreno, R. & Quiroz, D. Poblaciones costeras de Chile: marcadores genéticos en cuatro localidades. *Rev. Med. Chil.* **126**, 753-760 (1998).
  359. Olsson, M. L. *et al.* A clinically applicable method for determining the three major alleles at the Duffy (FY) blood group locus using polymerase chain reaction with allele-specific primers. *Transfusion* **38**, 168-173 (1998).
  360. Fernández-Santander, A. *et al.* Genetic relationships between southeastern Spain and Morocco: new data on ABO, RH, MNSS, and DUFFY polymorphisms. *Am. J. Hum. Biol.* **11**, 745-752 (1999).
  361. Cerda-Flores, R. M., Barton, S. A., Marty-Gonzalez, L. F., Rivas, F. & Chakraborty, R. Estimation of nonpaternity in the Mexican population of Nuevo Leon: a validation study with blood group markers. *Am. J. Phys. Anthropol.* **109**, 281-293 (1999).
  362. Hamblin, M. T. & Di Rienzo, A. Detection of the signature of natural selection in humans: evidence from the Duffy blood group locus. *Am. J. Hum. Genet.* **66**, 1669-1679 (2000).
  363. Luiselli, D., Simoni, L., Tarazona-Santos, E., Pastor, S. & Pettener, D. Genetic structure of Quechua-speakers of the Central Andes and geographic patterns of gene frequencies in South Amerindian populations. *Am. J. Phys. Anthropol.* **113**, 5-17 (2000).
  364. Shimizu, Y. *et al.* Sero- and molecular typing of Duffy blood group in Southeast Asians and Oceanians. *Hum. Biol.* **72**, 511-518 (2000).
  365. Novaretti, M. C. Z., Dorlhiac-Llacer, P. E. & Chamone, D. A. F. Estudo de grupos sanguíneos em doadores de sangue caucásoides e negróides na cidade de São Paulo. *Rev. Bras. Hematol. Hemoter.* **22**, 23-32 (2000).
  366. Goicoechea, A. S. *et al.* New genetic data on Amerindians from the Paraguayan Chaco. *Am. J. Hum. Biol.* **13**, 660-667 (2001).
  367. Azofeifa, J., Ruiz, E. & Barrantes, R. Blood group, red cell, and serum protein variation in the Cabecar and Huetar, two Chibchan Amerindian tribes of Costa Rica. *Am. J. Hum. Biol.* **13**, 57-64 (2001).
  368. Diedrich, B., Andersson, J., Sallander, S. & Shanwell, A. K, Fy(a), and Jk(a) phenotyping of

- donor RBCs on microplates. *Transfusion* **41**, 1263-1267 (2001).
369. Yan, L., Fu, Q., Jin, L. & Li, L. Duffy blood group phenotypes and genotypes in Chinese. *Transfusion* **41**, 970 (2001).
370. Velzing-Aarts, F. V., Muskiet, F. A., van der Dijs, F. P. & Duits, A. J. High serum interleukin-8 levels in Afro-Caribbean women with pre-eclampsia: relations with tumor necrosis factor-alpha, Duffy negative phenotype and von Willebrand factor. *Am. J. Reprod. Immunol.* **48**, 319-322 (2002).
371. Harich, N. *et al.* Classical polymorphisms in Berbers from Moyen Atlas (Morocco): genetics, geography, and historical evidence in the Mediterranean peoples. *Ann. Hum. Biol.* **29**, 473-487 (2002).
372. Weir-Medina, J. *et al.* Erythrocyte antigens and their relation to Bipolar Disease: a preliminary study. *Hum. Hered.* **43**, 25-34 (2002).
373. Morera, B., Barrantes, R. & Marin-Rojas, R. Gene admixture in the Costa Rican population. *Ann. Hum. Genet.* **67**, 71-80 (2003).
374. Bauduer, F. *et al.* Duffy blood group genotyping in French Basques using polymerase chain reaction with allele-specific primers (PCR-ASP). *Am. J. Hum. Biol.* **16**, 78-81 (2004).
375. Chiaroni, J. *et al.* Genetic characterization of the population of Grande Comore Island (Njazidja) according to major blood groups. *Hum. Biol.* **76**, 527-541 (2004).
376. Castilho, L. *et al.* A novel FY allele in Brazilians. *Vox Sang.* **87**, 190-195 (2004).
377. Herrera, S. *et al.* Antibody response to *Plasmodium vivax* antigens in Fy-negative individuals from the Colombian Pacific coast. *Am. J. Trop. Med. Hyg.* **73**, 44-49 (2005).
378. Wang, R. B. *et al.* Immune responses to *Plasmodium vivax* pre-erythrocytic stage antigens in naturally exposed Duffy-negative humans: a potential model for identification of liver-stage antigens. *Eur. J. Immunol.* **35**, 1859-1868 (2005).
379. Estalote, A. C., Proto-Siqueira, R., Silva, W. A., Jr., Zago, M. A. & Palatnik, M. The mutation G298A-->Ala100Thr on the coding sequence of the Duffy antigen/chemokine receptor gene in non-caucasian Brazilians. *Genet. Mol. Res.* **4**, 166-173 (2005).
380. Ferri, G. *et al.* Minisequencing-based genotyping of Duffy and ABO blood groups for forensic purposes. *J. Forensic Sci.* **51**, 357-360 (2006).
381. Perna, S. J., Cardoso, G. L. & Guerreiro, J. F. Duffy blood group genotypes among African-Brazilian communities of the Amazon region. *Genet. Mol. Res.* **6**, 166-172 (2007).
382. Sellami, M. H. *et al.* Duffy blood group system genotyping in an urban Tunisian population. *Ann. Hum. Biol.* **35**, 406-415 (2008).
383. Cotorruelo, C. M. *et al.* Distribution of the *FYB<sup>ES</sup>* and *RHCE\*ce(733C>G)* alleles in an Argentinean population: implications for transfusion medicine. *BMC Med. Genet.* **9**, 40 (2008).
384. Soares, S. C., Abé-Sandes, K., Nascimento Filho, V. B., Nunes, F. M. & Silva, W. A., Jr. Genetic polymorphisms in TLR4, CR1 and Duffy genes are not associated with malaria resistance in patients from Baixo Amazonas region, Brazil. *Genet. Mol. Res.* **7**, 1011-1019 (2008).
385. MalariaGEN Consortium. Duffy data from Burkina Faso. Further details can be found at <http://www.malariagen.net/network/cp1burkinafaso>. (2009)
386. MalariaGEN Consortium. Duffy data from Cameroon. Further details can be found at <http://www.malariagen.net/network/cp1cameroon>. (2009)
387. MalariaGEN Consortium. Duffy data from The Gambia. Further details can be found at <http://www.malariagen.net/network/cp1thegambia>. (2009)
388. MalariaGEN Consortium. Duffy data from Ghana. Further details can be found at <http://www.malariagen.net/network/cp1ghananoguchi>. (2009)
389. MalariaGEN Consortium. Duffy data from Kenya. Further details can be found at <http://www.malariagen.net/home/science/localprojects.php>. (2009)
390. MalariaGEN Consortium. Duffy data from Malawi. Further details can be found at <http://www.malariagen.net/network/cp1malawi>. (2009)

391. MalariaGEN Consortium. Duffy data from Tanzania. Further details can be found at <http://www.malariagen.net/network/cp1tanzaniamoshi>. (2009)
392. Arends A, Gòmez, G. Pers Comm. Duffy data from Venezuela. (2009)
393. Barnadas C, Ménard D, Zimmerman PA. Pers Comm. Duffy data from Madagascar. (2010)
394. Beall C, Gebremedhin A, Zimmerman PA. Pers Comm. Duffy data from Ethiopia. (2010)
395. Fairhurst RM, Long CA, Diakite M. Pers Comm. Duffy data from Mali. (2010)
396. Fairhurst RM, Socheat D. Pers Comm. Duffy data from Cambodia. (2010)
397. Ferreira MU. Pers Comm. Duffy data from Brazil. (2010)
398. Zimmerman PA. Pers Comm. Duffy data from West Africa. (2010)
399. Zimmerman PA. Pers Comm. Duffy data from Papua New Guinea. (2010)
